# Supplementary material
Source: publisher figshare collection journal article supplement (https://brill.figshare.com/articles/dataset/_/9675644)
Supplement: Supplementary file 1 [file 1]

## APPENDIX 11: DAMASCENUS TROIANENSIS (SEVENTEENTH-CENTURY BULGARIAN)

Bulgarian: *Троянски дамаскин/Trojanski damaskin*

Source: [http://histdict.uni-sofia.bg/textcorpus/show/doc\\_11](http://histdict.uni-sofia.bg/textcorpus/show/doc_11) (accessed on 22 March 2017)

Numbers after examples according to pages as they appear at [http://histdict.uni-sofia.bg/textcorpus/show/doc\\_11](http://histdict.uni-sofia.bg/textcorpus/show/doc_11) (accessed on 22 March 2017)

Only first two parts examined (27 pages)

Word count: 8,372 words

### BE-PERFECTS (OR EVIDENTIALS)

1. помысли си що си съгрѣшилъ богѹ дето са се минѣле днитѣ [8]
2. ‘think about what sins you have committed against God in the days that have gone by’
3. макаръ и да не си прѣгрѣшилъ дѹшманинѹ твоѣмѹ ты [11]  
‘even if you yourself haven’t sinned against your tormentor’
4. и стори ми си метаніе [11]  
‘and you have made amends to him’
5. чѣ си простиъ дѹшманина своѣго [11]  
‘that you have forgiven your tormentor’
6. Когѹ ти смрътъ дойде а ты се не си покаѣа [12]  
‘When your death draws near, and you haven’t repented’
7. чѣ си прѣдаъ дѹшѣта своѹ дѣволѹ [13]  
‘that you have given your soul to the devil’
8. Защо ти е далъ богъ жѣнѣ да раждашь дѣца [14]  
‘Because God has given you a wife to have children with’
9. щото око не ѣ видѣло, и оѹхо, не ѣ чѹло, и на срѣдце челоуекѹ не ѣ отишло [14]
10. ‘what the eye hasn’t seen, and the ear hasn’t heard, hasn’t gone to one’s heart’
- 11.
12. днѣс ли си съгрѣшилъ [16]  
‘if you have sinned today’
13. спаси дѹшата ми що е погинала [17]  
‘save my soul, which has perished’
14. ѡкъдѣ си дошѣлъ тѹка [17]  
‘Where have you come from?’
15. не питай ме владико ѡкъдѣ съмь тѹка дошѣлъ [17]  
‘don’t ask me, reverend father, where I have come from’
16. дѹшѣта що е Загинала. [17]  
‘[my] soul, which has perished’

17. **и не знаѣха че съ є обѣвилъ съсь нѣго** [18]  
‘and they didn’t know that he had wrapped it around himself’
18. **Стѣи владико. що си оставилъ** [18]  
‘Reverend father, why have you left...’
19. **ами се є вѣвонѣлъ, не може человекъ да пристѣпи близу при нѣго ѿ смрады** [18]  
‘and he has started to stink, so one can’t get near him because of the smell’
20. **да нде ѿ дѣто є дошѣлъ** [18]  
‘[let him] go where he came from’
21. **що си сторѣлъ, та тоѣа смрады ѿ тебе исхѣди** [19]  
‘what have you done to end up stinking like that’
22. **Защо бѣше изгнѣло тѣло то мѹ и прилѣпила мѹ се рѣзата** [19]
23. ‘Because his body had decayed and his shirt had got stuck’
24. **що бѣше изгнѣло ѿ месѣто мѹ** [19]  
‘his flesh that had decayed’
25. **видѣха тогѣва Какъ се є обѣвилъ съсь вѣжѣто** [19]  
‘and then they saw how he had wrapped the rope around himself’
26. **а азъ сѣчко такова зло съм сторѣлъ.** [19-20]  
‘and I have done all that evil’
27. **тѹка вѣке да нѣ є дошѣлъ никѣи** [20]  
‘let nobody return here again’
28. **и не оста нѣгде мѣсто гдѣ нѣ смѣ ходѣше. тѣкмо оу вѣвель Оухѣи нѣ смѣ ходѣше** [20]
29. ‘and no place was left where we hadn’t been; we only didn’t go to the dry well’
30. **прости ми това що ти смѣ сторѣлъ божѣи человекѣ Защо не смѣ Знаѣлъ** [21]
31. ‘forgive me what I have done to you, holy man, because little did I know’
32. **дѣто ви є далъ богъ тѹка стѣйте** [24]  
‘wherever God has allotted you, there you should abide’
33. **бѣше се Затворѣлъ** [26]  
‘he had locked himself in’
34. **єдному богѹ, дѣто є сторѣлъ небо и землю** [2]  
‘...to the one God, who created the heaven and the earth...’
35. **той чѣни бога крѣва дѣто є направѣлъ вѣана** [4-5]  
‘he thinks God wrong for having created the crow’
36. **ѣти є богъ сторѣлъ сѣчкѣи дни** [5]

‘since God created all days’

37. **Защо го си мъчилъ, и защо го си испъдилъ, Коё ти є зло сторилъ** [20]

38. ‘Why have you tormented him and why have you driven him away; has he done you

39. any wrong...’

40. **и казѧ на калогерете как є видѣлъ сѣнь страшенъ** [20]

‘and he told the monks that he had seen a frightening dream’

41. **и тоѧ часъ разумѣ светѣи Сѣмѣѧ че є оумрѣла майка му** [22]

‘and at that time Saint Simeon found out that that his mother had died’

42. **и що сѧ наоучилъ Іѡсифа. и [...] даvida що си оукрѣпилъ [...] и лѧзара [...] що сѧ**  
43. **въскрѣсилъ** [23]

44. ‘[thou] who taught Joseph and [...] helped David [...] and resurrected Lazarus’

45. **и сѧчкѣи мнѣха че є оумрѣлъ** [26]

‘and they all thought that he had died’

46. **помыслих да не бѣде съ рѣставилъ** [sic] [26]

‘I thought he might have passed away’

47. **и познахъ че съ є прѣставилъ** [26]

‘and I realised he had passed away’

48. **тоѧѧ познаха сѧчкѣи людіе че съ є прѣставилъ** [27]

‘and that’s when the multitude realised that he had passed away’

#### **A SAMPLE OF AORISTS IN EVIDENTIAL (NON-WITNESSED) FUNCTION**

‘Evidential’ aorists recorded in the first three pages

Word count for first three pages: 727 words

1. **И тѧ дѣсѣтъ Зѧръкѣи та гѣ написѧ богъ със прѣстыи свои. и даде гѣ на свѣтътъ** [2]

2. ‘And God wrote those Ten Commandments with his own fingers [hands] and gave them to the world...’

3. **тоѧ направи небо и зѣмлю, тоѧ рече и быѧ ѧгглы** [2-3]

4. ‘he [i.e. God] created/made the heaven and the earth, he spake and there were angels’

5.

6. **тоѧ съдаде... слѣзе... и выпльти се... и бы чакъ съврѣшенъ... и поживѣ на зѣме... напokonъ распѣ се и умрѣ...** [3]

7. ‘he [i.e. God] created [the human race]...

8. and came down [to earth]...

9. and was incarnated...

10. and was a perfect man...

11. and lived for a while on earth...

12. and was finally crucified and died’

13. **и не распѣ се божество** [3]

‘and God wasn’t crucified...’

14. снагáта детó а овлѣче́ Хс, тiа́ распѣ́та вы́ и оумрѣ́ [3]

15. ‘the body that Christ took on, it was crucified and died’

16. и по трѣ́ дни́ въскрѣ́ пакъ́ тѣ́ло́то мѹ. и iави́ се [3]

17. ‘and his body was resurrected three days later and he appeared...’

18. пакъ́ възлѣ́зе [3]

‘...ascended once again...’

### CONDITIONALS

1. и ище́ да вы́ѡа вы́лѣ́ добры́ и стѹ́и сѣ́чкы́ члове́ци [5]

‘and [God] wants all humans to be good and holy’

2. áко вы́ то́й наказу́валъ насъ́, [...] погуби́а вы́ насъ́ сѣ́чкы́ въ е́динъ часъ́ [7]

3. ‘if he were to punish us, [...] he would destroy us all at once’

4. ты́ да вы́ вы́ль до́брь [19]

‘if you were well-bred/good’

5. та вы́ ка́залъ [19]

‘then you would say’

### BE-PASSIVES/STATIVES

1. снагáта детó а овлѣче́ Хс, тiа́ распѣ́та вы́ и оумрѣ́ [3]

‘the body that Christ took on, it was crucified and died’

2. Амѣ́ е́ и съ́с ду́ша́ и съ́сь тѣ́ло́ прѣ́даде́нь дiа́волу́ [4]

‘And [he] has been given over to the devil body and soul’

3. сѣ́чкы́ члове́ци ѿ́ е́дногó бо́га сме́ съ́даде́ни [5]

‘all of us humans have been created by the only/same God’

4. и въ́ темни́цѣ́ да си́ запрѣ́нь [6]

‘and even if you’re locked away in prison’

5. не́ щѣ́те вы́ всѣ́де́ни [9]

‘you won’t be judged’

6. áко и въ́ темни́ца запрѣ́нь въ́дѣ́шь [9]

‘even if you’re locked away in prison’

7. сѣ́чкы́ са́ загубѣ́ни [11]

‘all are lost’

8. то́й е́ ... дiа́волу́ прѣ́даде́нь [12]

‘he is [...] committed to the devil’

9. **КОЛЦИНА ОУБИЕНИ БЫХА СРАМНО** [12]  
'how many were killed disgracefully'
10. **ДА НЕ БЕЗКРАЙНО МЪЧЕНЬ БЪДЕШЬ** [14]  
'so that you are not subjected to eternal torture'
11. **МЪЧЕН ЩЕ ДА БИДЕ** [15]  
'[he] will be tortured'
12. **АКО СИ Ѡ БОГА НАСТАВЕНЬ** [17]  
'if you are guided by God'
13. **КАКЪ Ё ВЪ БЕЗАКОНІЕ ЗАЧЕТЪ** [19]  
'how he was conceived out of wedlock/illegally'
14. **И НЕ БЫ І ДАДЕНО ДА ГО ВИДИ** [22]  
'and she wasn't allowed to see him'
15. **НЕ ТІ Ё ЗЕТО НИЩО** [27]  
'nothing has been taken from you'

### Aorists

Зарьча, написа, даде, направи, рече, быха, съдаде, слъзе, выплыти, бы, поживѣ, распе, умрѣ, распе, облъче, оумрѣ, въскрес(?), іави, възлъзе, вѣрѣваха(?), стори, рекохмѣ, рекохмѣ, постиха, спсоха, мъчи́ха, вѣри́на, посра́ми́ха, насмѣ́ха, рекохмѣ, преда́де, оу́готи́, прѣ́лѣсти, стана́ха, реко́ха, оумрѣ́ха, всѣ́мна́ха, оуда́ви́ха, изго́ри, свѣ́за, мо́го́ха, чю́, излѣ́зе, отиде́, лежа́, станѣ́, поиде́, покло́ни, па́де, ре(че́), ре(че́), ре(че́), чю́, ре(че́), оста́, иска́ха, отиде́, найде́, ѡвѣ́за, овѣ́и, облъ́че, отиде́, ре(че́), поидо́хъ, найдо́х, реко́ха, прѣ́вѣи, вѣ́иде, очервѣ́е, можѣ́, излѣ́зе, зава́ри, завидѣ́, поиде́, нава́ди, рече́, чю́, почю́ди, оупла́ши, поиде́, видѣ́, може́, оуво́и, ре(че́), попи́та(?), подѹ́ма, дѹ́ма, сръти́, разсръ́ди, ре(че́), Започе́ха, мо́го́ха, оу́зе́ха, съвѣ́ко́ха, ѡкрѣ́ти, видѣ́ха, оупла́ши́ха, оста́, чю́ди, ре(че́), роди́, почю́ди, доведе́, ѡвѣ́и, оумрѣ́, посѣ́свѣ́сти, поолѣ́кна, ре(че́), пооздра́ве, излѣ́зе, отиде́, вѣ́лѣзе, зна́и, ми́на́ха, видѣ́, ре(че́), съвѹ́ди, станѣ́, каза́, ре(че́), ѡндо́ха, иска́ха, найдо́ха, дойдо́ха, реко́ха, хо́ди́хмѣ, иска́хмѣ, оста́, ре(че́), стори́ха, Запали́ха, низпѹ́сти́ха, видѣ́ха, повѣ́гна́ха, видѣ́, приви́ка, извѣ́ко́ха, приве́до́ха, видѣ́, паднѣ́, моли́, дѹ́ма, сѣ́дѣ, повѣ́гна, зна́и, отиде́, направи́, се́дѣ, трѣ́пѣ, развѣ́ра, съгра́ди, стоа́, прочю́, съвѣ́ра́ха, Загра́ди́ха, напра́ви́ха, съгра́ди́ха, стоа́, исцѣ́ли, исцѣ́ли, исцѣ́ли, исцѣ́ли, минѣ́ха, стори́, развѣ́ра, при́иде, плака́, паднѣ́, оу́би, пѹ́сти, чю́, пѹ́сти, закле́, посе́дѣ, прѣ́даде, прѣ́стави, разѹ́мѣ, повелѣ́, видѣ́, наче́, ре(че́), помолѣ́, погрѣ́бо́ха, найдо́ха, ре(че́), станѣ́, фати́ха, закла́ха, изѹ́идо́ха, оста́, ѡнѣ́мѣ́ха, поче́ха, прите́ко́ха, показа́ха, оживѣ́, повѣ́гна, исцѣ́лѣ́ха, ѡндо́ха, оже́днѣ́, оу́зе, напи́, испи́, пора́сте, станѣ́, пи́, може́, Заве́до́ха, каза́ха, рече́, напи́, излѣ́зе, Заплѣ́зѣ, оста́ви, разси́па, просла́ви́ха, промѣ́ни, съгра́ди́ха, прочю́, Завидѣ́, излѣ́зе, съгни́, очервѣ́е, стоа́, при́иде, вѣ́лѣзе, моли́, поче́, испа́днѣ́, видѣ́, па́де, пѹ́сти, оу́зе, оста́ви, излѣ́зе, пѹ́сти, чю́, вѣ́лѣзе, ре(че́), ү́зе́х,

разгрѣнь, видѣ, рече, чю, рече, прие, отиде, случи, выпаде, испльзѣ, доплъзѣ, лежа, отвори, испадѣ, прѣвы, исцѣлѣ, отидѣ, стори, теглиха, чини, подума, бы, истече, ископах, найдѣх, вградих, потече, Гтоа, повелѣ, отвори, видѣх, отвори, почюдих, бы, вълѣзох, видѣх, подума, помыслих, вѣрѣвах(?), подумах, рекох, подума, пофатих, познахъ, плаках, цѣлѣвах, стоих, чюх, повдигнь, оуплаших, рекох, излѣзох, казах, пѣстих, дойдѣх, вълѣзох, занесох, вставих, спустих, познах, събраше, цѣловах, посегна, оусьхна, сторих, начех, оздраве, оугудих, повезох, посрешнѣх, вѣнесох, минѣх, повелѣ, съградих, пренесох, покажа

Total: approx. 314

### Imperfects

идѣше, піаше, вѣше, вѣше, имаше, вѣше, вѣше, вѣше, имах, думаша, вѣичех, вѣх, сѣдѣше, работѣше, любѣше, наливах, знаех, вѣше, давах, даваше, имах, идѣх, идѣше, поливах(?), чюдѣше, молѣше, мнѣх, цѣрѣвах(?), имаше, вѣх, смѣше, боих, молѣх, идѣше, имаше, Зовѣше, прихѣждах, прихѣждах, полѣчаша, оучеши, зарѣчаше, оучѣше, ищеше, желѣше, лежаше, двигнѣваше, обрашаше, глѣдах, чюдѣх, славѣх, хвалѣх, идѣх, носех, сдѣх, прихѣждах, оучаше, падах, съвѣраше, вставѣше, речѣше, знаѣше, живѣше, живѣше, растѣше, сомтѣше, можѣше, лежаше, вѣше, немаше, мнѣх, чинѣше, отворѣваше, проникнѣваше, думаше, чинѣше, боих, идѣше, боих, вѣше, Главлах, благодарѣх

Total: approx. 81
