# Supplementary material
Source: publisher figshare collection journal article supplement (https://brill.figshare.com/articles/dataset/_/9675644)
Supplement: Supplementary file 2 [file 1]

## APPENDIX 5: SHAKESPEARE

*The Taming of the Shrew* – Acts I, II, and III (Acts IV and V not included!)

Sources: Evans and Tobin et al. (1997); [http://shakespeare.mit.edu/taming\\_shrew/full.html](http://shakespeare.mit.edu/taming_shrew/full.html)  
(accessed on 28 July 2016)

Word count: approx. 13,247 words

### HAVE-PERFECTS WITH TRANSITIVES

(incl. prepositional objects, implied/unexpressed objects, and copula and auxiliary *be*)

1. You will not pay for the glasses you **have burst** ['broken']? [Induction, Scene I, l. 8]
2. I **have forgot** your name; [Induction, Scene I, l. 86]
3. Tell him from me, as he will win my love,  
He bear himself with honourable ['becoming, decorous'] action,  
Such as he **hath observed** in noble ladies [Induction, Scene I, l. 109-111]
4. Who for this seven years **hath esteem'd** him ['himself']  
No better than a poor and loathsome beggar [Induction, Scene I, l. 122-123]
5. the tears that she **hath shed** for thee [Induction, Scene II, l. 64]
6. Or **have I dream'd** till now? [Induction, Scene II, l. 69]
7. no such men as you **have reckon'd** up [Induction, Scene II, l. 92]
8. they say that I **have dream'd**  
And slept above some fifteen year or more. [Induction, Scene II, l. 112-113]
9. For your physicians **have expressly charged**,  
[...]  
That I should yet absent me from your bed [Induction, Scene II, l. 121, 123]
10. Seeing too much sadness **hath congeal'd** your blood [Induction, Scene II, l. 132]
11. for I **have** Pisa **left**  
And am to Padua come [I.i.21-22]
12. Gentlemen, that I may soon make good  
What I **have said** [I.i.74-75]
13. I am agreed, and would I **had given** him the best  
horse in Padua [I.i.142-143]
14. If love **have touch'd** you, nought remains [I.i.161]
15. And therefore **has** he closely **mew'd** her up ['placed her in close confinement'],  
Because ['so that'] she will not be annoy'd with suitors. [I.i.183-184]
16. that maid

Whose sudden sight **hath thrall'd** my wounded eye [I.i.219-220]

17. Master, **has** my fellow Tranio **stolen** your clothes? [I.i.223-224]

18. And I for my escape **have put** on his [i.e. 'his countenance, outward appearance'] [I.i.230]

19. Is there any man **has rebus'd** [blunder for 'abused'] your worship? [I.ii.6-7]

20. Whom would to God I **had** well **knock'd** at first,  
Then had not Grumio come by the worst. [I.ii.34-35]

21. And I **have thrust** myself into this maze [I.ii.55]

22. For those defects I **have** before **rehears'd** [I.ii.124]

23. Therefore this order **hath** Baptista **ta'en** [I.ii.126]

24. That none shall have access unto Bianca  
Till Katherine the curst **have got** a husband. [I.ii.127-128]

25. I **have perus'd** the note. [I.ii.144]

26. And by good fortune I **have lighted** well  
On this young man [I.ii.167-168]

27. and I **have met** a gentleman

28. **Hath promis'd** me to help [me] to another [I.ii.171-172]

29. Hortensio, **have** you **told** him all her faults? [I.ii.186]

30. **Have** I not in my time **heard** lions roar? [I.ii.200]

31. **Have** I not **heard** the sea puff'd up with winds [I.ii.201]

32. **Have** I not **heard** great ordnance ['cannon'] in the field [I.ii.203]

33. **Have** I not in a pitched battle **heard** [I.ii.205]

34. You **have** but **jested** with me all this while [II.i.20]

35. that report which I so oft **have heard** [II.i.53]

36. Left soly ['solely'] heir to all his lands and goods,  
Which I **have bettered** rather than **decreas'd** [II.i.117-118]

37. for she **hath broke** the lute to me [II.i.148]

38. As ['as if'] **had** she **studied** to misuse me so [II.i.159]
39. Well **have** you **heard** [II.i.183]
40. Thou **hast hit** it [II.i.198]
41. your father **hath consented**  
That you shall be my wife [II.i.269-270]
42. You **have show'd** a tender fatherly regard [II.i.286]
43. yourself and all the world,  
That talk'd of her, **have talk'd** amiss of her [II.i.290-291]
44. we **have 'greed** so well together,  
That upon Sunday is the wedding-day [II.i.297-298]
45. No doubt but he **hath got** a quiet catch. [II.i.331]
46. Now is the day we long **have looked** for [II.i.333]
47. In ivory coffers I **have stuff'd** my crowns [II.i.350]
48. What, **have I pinch'd** ['discomfited'] you, Signior Gremio? [II.i.371]
49. What, **have I chok'd** ['silenced'] you with an argosy ['large merchant vessel']?  
[II.i.376]
50. Nay, I **have off'red** all, I have no more [II.i.381]
51. Yet I **have faced** it [...] [II.i.405]
52. **Have** you so soon **forgot** the entertainment [III.i.2]
53. And when in music we **have spent** an hour [III.i.7]
54. His lecture will be done ere you **have tun'd**. [III.i.23]
55. Yet never means to wed where he **hath woo'd**. [III.ii.17]
56. Would Katherine **had** never **seen** him though! [III.ii.26]
57. what occasion of import  
**Hath** all so long **detain'd** you from your wife,  
And **sent** you hither so unlike yourself? [III.ii.102-104]
58. therefore **ha'** ['have'] **done** with words [III.ii.116]
59. greater sums than I **have promised** [III.ii.135]

60. And **have prepared** great store of wedding cheer [III.ii.186]
61. I thank you all  
That **have beheld** me give away myself  
To this most patient, sweet and virtuous wife [III.ii.193-195]
62. the oats **have eaten**  
the horses [III.ii.205-206]
63. Persuade him that he **hath been** lunatic [Induction, Scene I, l. 63]
64. These fifteen years you **have been** in a dream; [Induction, Scene II, l. 79]
65. We **have** not yet **been** seen in any house [I.i.199]
66. Sirrah, where **have** you **been**? [I.i.221]
67. Where **have** I **been**? [I.i.222]
68. To express the like kindness, myself, that **have**  
**been** more kindly beholding [‘beholden, indebted’] to you than any [II.i.77-78]
69. this young scholar,  
that **hath been** long studying at Rheims [II.i.79-80]
70. I **have been** thus pleasant [‘merry’] with you both [III.i.58]
71. More pleasant, pithy and effectual,  
Than **hath been** taught by any of my trade [III.i.68-69]
72. boots that **have been** candle-cases [III.ii.45]
73. which being restrain’d [‘drawn tight’] to keep him from stumbling,  
**hath been** often burst [‘broken’] [III.ii.58-59]
74. as if  
He **had been** aboard [‘aboard ship’] [III.ii.170-171]

#### **HAVE-PERFECTS WITH INTRANSITIVES**

1. they say that I **have** dream’d  
And **slept** above some fifteen year or more. [Induction, Scene II, l. 112-113]
2. Whom would to God I had well knock’d at first,  
Then **had** not Grumio **come** by the worst. [I.ii.34-35]

#### **Modal and causative have**

1. we’ll **have** thee to a couch  
Softer and sweeter than the lustful bed

On purpose trimm'd up for Semiramis. [Induction, Scene II, l. 37-39]

2. but I **had** as lief **take** her  
dowry with this condition: to be whipt at the high  
cross every morning [I.i.131-133]
3. and then **have to't** afresh [I.i.139]
4. I'll **have** them ['books'] very fairly ['handsomely'] **bound** ['I desire them to be, i.e.  
see that they are'] [I.ii.145]
5. Take your paper too,  
And let me **have** them ['books'] very well **perfum'd** [I.ii.150-151]
6. what **have** you **to do**? [I.ii.224, Evans and Tobin (1997: 151) give the translation  
'what is it to you']
7. I will be angry; what **hast** thou **to do**?  
Father, be quiet [III.ii.216-217] [Evans and Tobin (1997: 159) supply the translation  
'it's no concern of yours']

#### **BE-PERFECTS WITH MUTATIVE INTRANSITIVES**

1. you **are come** to me in happy time ['opportunely'] [Induction, Scene I, l. 90]
2. Thrice noble lord, let me entreat of you  
To pardon me yet for a night or two,  
Or, if not so, until the sun **be set**: [Induction, Scene II, l. 118-120]
3. Your honor's players, hearing your amendment,  
**Are come** to play a pleasant ['merry'] comedy [Induction, Scene II, l. 129-130]
4. I **am arrived** for fruitful ['fertile'] Lombardy ['have come here on my way to'] [I.i.3]
5. for I have Pisa left  
And **am** to Padua **come** [I.i.21-22]
6. If, Biondello, thou **wert come** ashore,  
We could at once put us in readiness, [I.i.42-43]
7. My master **is grown** quarrelsome. [I.ii.13]
8. Sirrah, **be gone**, or talk not, I advise you. [I.ii.44]
9. Crowns in my purse I have and goods at home,  
And so **am come** abroad to see the world. [I.ii.57-58]
10. since we **are stepp'd** thus far in,  
I will continue [...] [I.ii.83-84]

11. This gentleman **is** happily [‘propitiously’] **arriv’d** [I.ii.212]

12. Fellows, let’s **be gone**. [I.ii.278]

13. I **must be gone** [III.i.85]

14. **Is** he **come**? [III.ii.35]

15. BAPTISTA

You **are welcome**, sir.

PETRUCHIO

And yet I come not well. [III.ii.88]

16. Sufficeth I **am come** to keep my word [III.ii.106]

17. For me, **I’ll not be gone** till I please myself. [III.ii.212]

### PROGRESSIVES

1. Trow [‘know’] you whither I **am going**? [I.ii.164]

2. I would fain **be doing** [‘getting on with the business’, alternatively ‘having sex’]  
[II.i.73]

3. this young scholar,  
that hath **been** long **studying** at Rheims [II.i.79-80]

4. besides an argosy [‘large merchant vessel’]  
That now **is lying** in Marsellis road [‘harbour of Marseilles’] [II.i.374-375]

5. I **should be arguing** still upon that doubt [III.i.55]

6. He **is coming**. [III.ii.38]

7. Why, Petruchio **is coming** in a new hat [...] [III.ii.43]

8. And **is** the bride and bridegroom **coming** home? [III.ii.151]

9. as he **was drinking** [III.ii.176]

10. And after me I know the rout [‘crowd’] **is coming**. [III.ii.181]

11. You **may be jogging** [III.ii.211]

### MODAL BE

1. I am thus resolv’d: on Sunday next you know  
My daughter Katherine **is to be married**. [II.i.393-394]

2. I **am to** get a man – whate’er he be,

It skills ['matters'] not much, we'll fit him to our turn [III.ii.131-132]

### PASSIVES

1. What think you, if he **were convey'd** to bed  
**Wrapp'd** in sweet clothes, rings **put** upon his fingers,  
A most delicious banquet by his bed, [Induction, Scene I, l. 37-39]
2. If it **be husbanded** with modesty ['managed with restraint']. [Induction, Scene I, l. 68]
3. that part  
**Was** aptly **fitted** and naturally ['realistically'] **perform'd**. [Induction, Scene I, l. 86-87]
4. **being** close **convey'd** [Induction, Scene I, l. 127]
5. O, that a mighty man of such descent,  
Of such possessions and so high esteem,  
**Should be infused** with so foul a spirit! [Induction, Scene II, l. 14-16]
6. We'll show thee Io as she was a maid,  
And how she **was beguiled** and **surprised**,
7. As lively ['realistically'] painted as the deed **was done**. [Induction, Scene II, l. 54-56]
8. So workmanly the blood and tears **are drawn**. [Induction, Scene II, l. 60]
9. Yet would you say ye **were beaten** out of door [Induction, Scene II, l. 85]
10. Now Lord **be thanked** for my good amends ['mendment, recovery']! [Induction, Scene II, l. 97]
11. By virtue specially to **be achieved** [I.i.20]
12. No profit grows where **is** no pleasure **ta'en** [I.i.39]
13. **shall I be appointed** hours [I.i.103]
14. Think'st thou, Hortensio,  
though her father be very rich, any man is so very ['completely']  
a fool to **be married** to hell? [I.i.123-125]
15. but I had as lief take her  
dowry with this condition: to **be whipt** at the high  
cross every morning [I.i.131-133]
16. it **shall be** so far forth friendly  
**maintain'd** [...] [I.i.136-137]
17. Affection **is** not **rated** ['driven away by scolding'] from the heart [I.i.160]

18. And therefore has he closely mew'd her up ['placed her in close confinement'],  
Because ['so that'] she **will not be annoy'd** with suitors. [I.i.183-184]
19. and now **'tis plotted** [I.i.188]
20. **may it be done?** [I.i.193]
21. We have not yet **been seen** in any house [I.i.199]
22. Nor **can we be distinguish'd** by our faces [I.i.200]
23. **'Tis hatch'd** and shall be so [I.i.206]
24. I kill'd a man and fear I **was descried** [I.i.232]
25. That ever Katherine **will be woo'd** [I.ii.125]
26. Until the elder sister first **be wed** [I.ii.261]
27. Her silence flouts me, and **I'll be reveng'd**. [II.i.29]
28. **Was** ever gentleman thus **griev'd** as I? [II.i.37]
29. Let specialties ['express contracts'] **be** therefore **drawn** between us
30. That covenants **may be kept** on either hand. [II.i.126-127]
31. Ay, when the special thing **is** well **obtain'd** [II.i.128]
32. and when **be married** [II.i.180]
33. Asses **are made** to bear [II.i.199]
34. Women **are made** to bear [II.i.200]
35. **'Twas told** me you were rough [II.i.243]
36. Thou **must be married** to no man but me [II.i.275]
37. For I am he **am born** to tame you, Kate [II.i.276]
38. **'Tis bargain'd** 'twixt us twain, being alone,  
That she shall still be curst in company [II.i.304-305]
39. And kiss me, Kate, we **will be married** a' Sunday [II.i.324]
40. **Was** ever match **clapp'd up** ['settled'] so suddenly? [II.i.325]
41. **'tis known** my father hath no less  
Than three great argosies ['large merchant vessels'] [II.i.377-378]



42. I am thus resolv'd: on Sunday next you know  
My daughter Katherine is to **be married**. [II.i.393-394]
43. To know the cause why music **was ordain'd** ['instituted']! [III.i.10]
44. I'll not **be tied** to hours [III.i.19]
45. but ['unless'] I **be deceiv'd** [III.i.62]
46. More pleasant, pithy and effectual,  
Than hath **been taught** by any of my trade [III.i.68-69]
47. this is the 'pointed day,  
That Katherine and Petruchio **should be married** [III.ii.1-2]
48. What **will be said**? [III.ii.4]
49. I **must** forsooth **be forc'd** [III.ii.8]
50. to **be noted** [III.ii.14]
51. which **being restrain'd** ['drawn tight'] to keep him from stumbling,  
52. hath **been** often **burst** ['broken'] [III.ii.58-59]
53. To me **she's married**, not unto my clothes [III.ii.117] [i.e. 'she is being married']
54. I see a woman **may be made** a fool [III.ii.220]
55. we **are beset** with thieves [III.ii.236]
56. being mad herself, **she's** madly **mated** [III.ii.244]
57. I warrant him, Petruchio **is Kated**. [III.ii.245]

#### AMBIGUITY BETWEEN PASSIVE AND STATIVE

1. the poor cur **is emboss'd** ['foaming at the mouth'] [Induction, Scene I, l. 17]
2. **Were** he not **warm'd** with ale,  
This were a bed but cold to sleep so soundly. [Induction, Scene I, l. 31-32]
3. I **am** not **bestraught** ['distracted, mad'] [Induction, Scene II, l. 25]
4. Thy horses **shall be trapp'd** ['adorned']  
Their harness **studded** all with gold and pearl. [Induction, Scene II, l. 41-42]
5. for you **are call'd** plain Kate [II.i.185]
6. Ay, and the time seems thirty unto me,

**Being** all this time **abandon'd** ['banished'] from your bed. [Induction, Scene II, l. 114-115]

7. And by my father's love and leave **am arm'd**  
With his good will and thy good company [I.i.5-6]
8. But **art** thou not **advis'd** ['aware'], he took some care [I.i.186]
9. I **am tied** to be obedient [I.i.212]
10. would '**twere done!** [I.i.254]
11. And you **are** well **met**, Signior Hortensio. [I.ii.163]
12. But **be** thou **arm'd** for some unhappy ['hateful'] words. [II.i.139]
13. Well, go with me and **be** not so **discomfited** [II.i.163]
14. Yet you **are wither'd**. [II.i.237]
15. If she and I **be pleased**, what's that to you? [II.i.303]
16. my house within the city  
**Is** richly **furnished** with plate and gold [II.i.346-347]
17. By your firm promise: Gremio **is outvied** ['outdone']. [II.i.385]
18. His lecture **will be done** ere you have tun'd. [III.i.23]
19. As you **shall** well **be satisfied** with all [III.ii.109]

#### AMBIGUITY BETWEEN BE-PERFECT AND PASSIVE OR STATIVE

1. Myself **am strook** ['struck, i.e. advanced'] in years, I must confess [II.i.360]
2. For how I firmly **am resolv'd** you know:  
That is, not to bestow my youngest daughter  
Before I have a husband for the elder [I.i.49-51]
3. I **am resolv'd** [I.i.90]
4. I **am agreed**, and would I had given him the best  
horse in Padua [I.i.142-143]
5. Tranio **is chang'd** into Lucentio. [I.i.237]
6. My lord, '**tis but begun**. [i.e. 'the play is but begun'] [I.i.252]
7. PETRUCHIO:  
Myself **am mov'd** to woo thee for my wife.

KATHERINE:

Mov'd! in good time ['indeed, forsooth']! Let him that mov'd you hither  
Remove you hence. I knew you at the first  
You were a moveable. [II.i.194-197]

8. I **am** thus **resolv'd**: on Sunday next you know  
My daughter Katherine is to be married. [II.i.393-394]

#### MISSING AUXILIARY

1. A merchant of great traffic ['business'] through the world,  
Vincentio, **come** of the Bentivolii. [I.i.12-13]
2. [his horse] **sped** ['far gone']  
with spavins ['a disease'] [III.ii.52-53]

#### 'S CONTRACTION

1. I am glad **he's come**, howsoe'er he comes. [III.ii.74]
