# Supplementary material
Source: publisher figshare collection journal article supplement (https://brill.figshare.com/articles/dataset/_/9675644)
Supplement: Supplementary file 3 [file 1]

## APPENDIX 7: PASTON LETTERS

### WILLIAM PASTON I

Source: <http://quod.lib.umich.edu/c/cme/Paston/1:1?rgn=div1;view=fulltext> (accessed on 22 August 2013)

Written between 1425 and 1436

Word count: 5,343 words

#### HAVE-PERFECTS WITH TRANSITIVES

(incl. prepositional objects, implied/unexpressed objects, and copula and auxiliary *be*)

1. thank yow for þe good, trew, and diligent labour ye **haue hadde** for þe matier [TO AN UNIDENTIFIED LAWYER IN ROME: DRAFT 1425, 11, 05]
2. þe seyð John Wortes and a contréman [unclear] of myn in þe seyð court, Maister John Vrry, **haue sent** me lettres [TO AN UNIDENTIFIED LAWYER IN ROME: DRAFT 1425, 11, 05]
3. and other fleyng tales þat I **haue herd** sithen [TO AN UNIDENTIFIED LAWYER IN ROME: DRAFT 1425, 11, 05]
4. I **haue resceyued** yowr goodly lettres [PROBABLY TO MASTER JOHN URRY: DRAFT 1425, 11]
5. þat Ser John Paston vt assereit **hath optyned** me condempnyd to hym in ccc marc3 [PROBABLY TO MASTER JOHN URRY: DRAFT 1425, 11]
6. and þat þe same John, atte reuerence of yowr right worthy persone, **hath cesed** of his sute of certains processes ageyns me [PROBABLY TO MASTER JOHN URRY: DRAFT 1425, 11]
7. vn frendly lettre þat þe seyð John **hath sent** to me late [PROBABLY TO MASTER JOHN URRY: DRAFT 1425, 11]
8. þe seyð Priour **hath sent** also to yow [PROBABLY TO MASTER JOHN URRY: DRAFT 1425, 11]
9. and as he **hath enformed** yow [PROBABLY TO MASTER JOHN URRY: DRAFT 1425, 11]
10. and more I **haue** nought **hadde** to do with þe seyð John [PROBABLY TO MASTER JOHN URRY: DRAFT 1425, 11]
11. I **haue**, after þe aduys of yowr lettre, **doon** dwely examyned þe jnstrument by þe wysest I coude fynde here [TO WILLIAM WORSTED, JOHN LONGHAM, AND PIERS SHELTON 1426, 03, 01]
12. I **haue taken** aduys of Maister Robert Bruus [TO WILLIAM WORSTED, JOHN LONGHAM, AND PIERS SHELTON 1426, 03, 01]

13. and by this acceptacion of þis bysshopriche he **hath pryued** hym-self of þe tittle þat he claymed in Bromholm, and so **adnulled** þe ground of his processe a-geyn me. [TO WILLIAM WORSTED, JOHN LONGHAM, AND PIERS SHELTON 1426, 03, 01]
14. I **haue preyed** my maister Hamond to write yow tydyngges [TO WILLIAM WORSTED, JOHN LONGHAM, AND PIERS SHELTON 1426, 03, 01]
15. þere hem for to **have hangyd**; [MEMORANDUM TO ARBITRATORS 1426-7]
16. supposyng þat þe seyð Walter **wold have holde** and **parfourmyd** þe seyð ordinaunce, [MEMORANDUM TO ARBITRATORS 1426-7]
17. and **hath absteyned** hym of al maner of execucion, sewyng of godes or
18. catelles þat by force of þe seyð processe or ony othyr he **myght have had** ageyn þe seyð Walter or hese borwes [MEMORANDUM TO ARBITRATORS 1426-7]
19. ne þat þe seyð William **hath suffred** þe seyð Walter to gon at large by long
20. tyme whan he **myght haue had** hys body in warde in lawefull fourme [MEMORANDUM TO ARBITRATORS 1426-7]
21. and at diuers tymes in diuers other maneres **hath noysed** and **skaundered** þe seyð William vngoodly [MEMORANDUM TO ARBITRATORS 1426-7]
22. Ouermore þe seyð Walter **hath sued**, and yet rigerously sueth, a wrytte [MEMORANDUM TO ARBITRATORS 1426-7]
23. supposyng by hese seyð sute hem to **have taken** of þe seyð William in hys seyð sute lxij li. [MEMORANDUM TO ARBITRATORS 1426-7]
24. And also þe seyð Walter **hath sued** and yet pursuyth Adam Aubré [MEMORANDUM TO ARBITRATORS 1426-7]
25. Ouermore þe seyð William, atte commaundement of þe seyð Duc of Norffolk, **hath submytted** hym to stonde to þe ordinaunce of diuers persones [MEMORANDUM TO ARBITRATORS 1426-7]
26. And also þe Priour of þe seyð hous [unclear] **hath resigned** in-to yowre worthy handes by certains notables and resonables causes [TO THE VICAR OF THE ABBOT OF CLUNY: DRAFT 1430, 04?]
27. þ'estate þat þe seid Roys **shuld have hadde** in þe seid maner and in stoor ther-of shul have be condicionel to be voide and nought for defaute of payement [TO AN UNIDENTIFIED LORD: DRAFT 1436]
28. and **hath hadde** and **taken** þe profitz of þe seid maner by iij hool yeer befor his deth to þe value of xxx li [TO AN UNIDENTIFIED LORD: DRAFT 1436]

29. þer was þan no swich processe sued ne **had** [TO AN UNIDENTIFIED LAWYER IN ROME: DRAFT 1425, 11, 05]
30. þe seyð Priour hath sent also to yow and to Mayster Will Swan, which longe tyme **hath be** his procuratour [PROBABLY TO MASTER JOHN URRY: DRAFT 1425, 11]
31. the whiche submission wyth alle þe circumstaunces þer-of þe seyð William **hath be** at alle tymes redy to obeye [MEMORANDUM TO ARBITRATORS 1426-7]
32. þ'estate þat þe seid Roys shuld have hadde in þe seid maner and in stoor ther-of **shul have be** condicionel to be voide and nought for defaute of payement [TO AN UNIDENTIFIED LORD: DRAFT 1436]

#### HAVE-PERFECTS WITH INTRANSITIVES

1. I **haue** nought **trespassed** a-geyn noon of these iij [TO WILLIAM WORSTED, JOHN LONGHAM, AND PIERS SHELTON 1426, 03, 01]
2. monkes clad and vn-professyd, þat **have abedyn** þere wythow [unclear] t abyte ix or x yeere, [TO THE VICAR OF THE ABBOT OF CLUNY: DRAFT 1430, 04?]

#### MODAL AND CAUSATIVE HAVE

1. I wold **haue** swiche stoon a xxti tunne tight **caried** to Moneslee in Norffolk [To JOHN STANFORD 1425]
2. and how sone I myght **haue** the seid stoon **caried** to Moneslé a-forn seid [To JOHN STANFORD 1425]

#### BE-PERFECTS WITH MUTATIVE INTRANSITIVES

1. Myn aduersarie **is become** bysshop of Cork in Irland [TO WILLIAM WORSTED, JOHN LONGHAM, AND PIERS SHELTON 1426, 03, 01]

#### PROGRESSIVES

#### MODAL BE

#### PASSIVES

1. whether þe stoon **may be sawed** or nought [To JOHN STANFORD 1425]
2. þo grete stones and nought þe smallere stones **shuld be sawed** so þat euery pece sawed shuld holde þe seid lengthe of iij foote [To JOHN STANFORD 1425]
3. after it **is sawed** [To JOHN STANFORD 1425]
4. It **is told** me sithen þat... [TO AN UNIDENTIFIED LAWYER IN ROME: DRAFT 1425, 11, 05]

5. wherby it **is seyð** here þat... [TO AN UNIDENTIFIED LAWYER IN ROME: DRAFT 1425, 11, 05]
6. to espie if any swych processe **were sued** ageyn me as þe seyð lettres specifien, [TO AN UNIDENTIFIED LAWYER IN ROME: DRAFT 1425, 11, 05]
7. þer **was** þan no swich processe **sued** ne had [TO AN UNIDENTIFIED LAWYER IN ROME: DRAFT 1425, 11, 05]
8. to yowr worshepe **be saued** [TO AN UNIDENTIFIED LAWYER IN ROME: DRAFT 1425, 11, 05]
9. and whou ye wil I **be gouerned** in þis mater. [TO AN UNIDENTIFIED LAWYER IN ROME: DRAFT 1425, 11, 05]
10. I **was** neuere **somouned** ne neuer hadde tydynges of þis matier [TO AN UNIDENTIFIED LAWYER IN ROME: DRAFT 1425, 11, 05]
11. þan **is specified** in þe seyð instruccion [TO AN UNIDENTIFIED LAWYER IN ROME: DRAFT 1425, 11, 05]
12. þe seyð Priour, his brether, and I also willen gladdely in these matieres **be treted** by yow [PROBABLY TO MASTER JOHN URRY: DRAFT 1425, 11]
13. and if þis mesure **be accepted** [PROBABLY TO MASTER JOHN URRY: DRAFT 1425, 11]
14. And if þis continuance **be refused** [PROBABLY TO MASTER JOHN URRY: DRAFT 1425, 11]
15. so we wil **be gouerned** in yowr rewarde [PROBABLY TO MASTER JOHN URRY: DRAFT 1425, 11]
16. **Be it remembred** þat where... [MEMORANDUM TO ARBITRATORS 1426-7]
17. in þe most orrible wyse þat euer **was herd** spoken of in þat cuntré [MEMORANDUM TO ARBITRATORS 1426-7]
18. in drede and intollerable fere to **be slayn** and **mordered** in þe seyð forme [MEMORANDUM TO ARBITRATORS 1426-7]
19. þat þe seyð William and hese clerkes and seruauntes **schuld be slayn** and **mordered** in lyke fourme [MEMORANDUM TO ARBITRATORS 1426-7]
20. as þe seyð John Grys in þe seyð fourme **was slayn** and **mordered** [MEMORANDUM TO ARBITRATORS 1426-7]
21. by whiche wordes commvnely it **was vndyrstandyn** þat [MEMORANDUM TO ARBITRATORS 1426-7]

22. more malice and harm þan in þe seyð billes **was expressed** [MEMORANDUM TO ARBITRATORS 1426-7]
23. to **be slayn** and **mordered** [MEMORANDUM TO ARBITRATORS 1426-7]
24. til þe seyð Walter and Richard **were founden** guilty of þe seyð trespas by an jnquisicion þer-of takyn in dwe and lawefull fourme [MEMORANDUM TO ARBITRATORS 1426-7]
25. by whiche jnquisicion þe damages of þe seyð William for þe seyð trespas **were taxed** to cxx li [MEMORANDUM TO ARBITRATORS 1426-7]
26. ... **were induced** to trete in þe same matier [MEMORANDUM TO ARBITRATORS 1426-7]
27. ... **were made** wythinne xl dayes [MEMORANDUM TO ARBITRATORS 1426-7]
28. it **was accordyd** bytween þe seyð William and Walter þat þei schuld stande and obeye... [MEMORANDUM TO ARBITRATORS 1426-7]
29. a nounpier to **be chosen** by þe same arbitrores [MEMORANDUM TO ARBITRATORS 1426-7]
30. þe same ordinaunce and award wretyn **was red** byforn þe seyð arbitrores [MEMORANDUM TO ARBITRATORS 1426-7]
31. ... **was affermed** and **ensealed** and **left** in þe handes of þe seyð Ser Bryan [MEMORANDUM TO ARBITRATORS 1426-7]
32. saueliche to **be kept** in pleyn remembraunce of þe seyð award and ordinaunce [MEMORANDUM TO ARBITRATORS 1426-7]
33. ...**was remytted** to þe Kynges prison at Norwich [MEMORANDUM TO ARBITRATORS 1426-7]
34. to **be supported** by hese high lordship in þis seyð matier [MEMORANDUM TO ARBITRATORS 1426-7]
35. by whose reule and commaundement þe seyð arbitrement and award **was mad** in þe fourme afor seyð [MEMORANDUM TO ARBITRATORS 1426-7]
36. and ouermore caused þe seyð William orribly to **be manassed** of hys deth [MEMORANDUM TO ARBITRATORS 1426-7]
37. to **be slayn** and **mordered** [MEMORANDUM TO ARBITRATORS 1426-7]
38. Thys scrowe **is mad** only for þe jnformacion of þe worthy and worshepful lordes þe arbitrores [MEMORANDUM TO ARBITRATORS 1426-7]

39. a myle fro þe place where I **was born** [TO THE VICAR OF THE ABBOT OF CLUNY: DRAFT 1430, 04?]
40. Wher-of, thogh þe lawe wille it not, **were abated**, if conscience required it, cxl marcz payed by þe seid John Roys [TO AN UNIDENTIFIED LORD: DRAFT 1436]
41. if it **may be preved** þis mater be trewe þat ye wille not be displesed [TO AN UNIDENTIFIED LORD: DRAFT 1436]

#### AMBIGUITY BETWEEN PASSIVE AND STATIVE

1. of þe stoon **be** euery stoon weel **bedded** in-to þe walle and a foote thikke þat it ryse in heighte a foote in þe walle, and x stones of þe stoon must be ij foote brood [To JOHN STANFORD 1425]
2. betwen þe seid weel bedded stonys þat shuld rise but a fote in þe walle and **ben ankered** iche of hem with other [To JOHN STANFORD 1425]
3. it is seyde here þat his pretense of his title to þe priourie of Bromholm **is adnulled** and voide in yowr lawe. [TO AN UNIDENTIFIED LAWYER IN ROME: DRAFT 1425, 11, 05]
4. I prey yow hertily to **be** saddely **auysed** in þese matieres [TO AN UNIDENTIFIED LAWYER IN ROME: DRAFT 1425, 11, 05]
5. and be-cause ye **arn** her **beneficed**, owr cuntréman, and of worshepe and cunnyng worthyly **endowed**, þe seyde Priour, his brether, and I also willen gladdely... [PROBABLY TO MASTER JOHN URRY: DRAFT 1425, 11]
6. and yet I **am** foule and noysyngly **vexed** with hem to my gret vnease [TO WILLIAM WORSTED, JOHN LONGHAM, AND PIERS SHELTON 1426, 03, 01]
7. ne þat þe seyde William ne **is** not **satisfied** of þe seyde cxx li [MEMORANDUM TO ARBITRATORS 1426-7]
8. þat þe seid maner and all þe vesture and crop þer-of þis yeer by trewe title in lawe and conscience **is** his owen, trewly **bowth** and in gret partye **payed** for, [TO AN UNIDENTIFIED LORD: DRAFT 1436]
9. if it may be preved þis mater be trewe þat ye **wille** not **be displesed** [TO AN UNIDENTIFIED LORD: DRAFT 1436]

#### AMBIGUITY BETWEEN BE-PERFECT AND PASSIVE OR STATIVE

1. And here aunswere is þat al þis processe, þough it **were** in dede **proceded** as þe instrument specifieth, is not suffisant in þe lawe of Holy Cherche [TO WILLIAM WORSTED, JOHN LONGHAM, AND PIERS SHELTON 1426, 03, 01]

2. ne yet ne dar not, rydyn ne goo abowte swyche occupacion as he **arn vsed** and **disposed** [MEMORANDUM TO ARBITRATORS 1426-7]
3. in whiche sute in þe seyð court it **is proceded** ageyn þe seyð Adam in other maner þanne othyr lawe, conscience, or good feyth wolde [MEMORANDUM TO ARBITRATORS 1426-7]

#### MISSING AUXILIARY

1. A prest of Norffolk þat spak with yow in Jull or August last **passed** told me þat... [TO AN UNIDENTIFIED LAWYER IN ROME: DRAFT 1425, 11, 05]
2. where þe seyð William þe tyme of þe seyð enformacion was, wyth Ser John Jermy, knyght, and othre of þe counseill of þe seyð Duk of Norffolk in hys lordshipes in Norffolk and Suffolke þanne to hym **falle** by þe deth of þe right worthy and noble lady hys modyr [MEMORANDUM TO ARBITRATORS 1426-7]

#### 'S CONTRACTION

## WILLIAM PASTON III

Source: <http://quod.lib.umich.edu/c/cme/Paston/1:13?rgn=div1;view=fulltext> (accessed on 25 August 2016)

Written between 1478 and 1492

Word count: 4,616 words

### HAVE-PERFECTS WITH TRANSITIVES

(incl. prepositional objects, implied/unexpressed objects, and copula and auxiliary *be*)

1. letynge yow wete that I **haue reseuyd** of Alwedyr a lettyr and a nobyll in gowlde per-in. [TO JOHN PASTON III 1478, 11, 07]
2. Also 3e sende me worde in the letter of xij li. fyggys and viij li. reysons. I
3. **haue** them nott **delyuered**, but I dowte not I schal **haue**, [TO JOHN PASTON III 1479, 02, 23]
4. sauynge that my brodyr **hathe gotyn** a pardon for þe alyenacion [TO EDMOND PASTON II 1480, 02, 22]
5. I **haue asked** my lord of it [TO JOHN PASTON III 1487, 00, 307]
6. and **hathe endentyd** wyth the Kynge for the kepynge owt of the Schottys and warrynge on them [TO JOHN PASTON III 1487, 00, 307]
7. he **hathe sende** yow a rynge be Edmonde Dorman [TO JOHN PASTON III 1487, 00, 307]
8. my lorde **hathe made** grete boste of the fayre and goode gentylwomen of þe contré [TO JOHN PASTON III 1487, 00, 307]
9. Syr, my lorde **hathe sente** on-to þe most part of the gentyl-men of Essex to wayte vp-on hym at Chelmnysford, [TO JOHN PASTON III 1487, 00, 307]
10. for I **haue tolde** the masengere that he schulde brynge me nothyng butt euydens [TO THE BAILIFF OF MAUTBY 1487]
11. where as it was seyde that my lord Woddevyle and other schulde haue gone ouer in-to Breten to **haue eyded** the Duke of Breten [TO JOHN PASTON III 1488, 05, 13]
12. where it was seyde that he **schulde haue takyn** schypppyng to **haue waytyd**
13. vpon hym ouer [TO JOHN PASTON III 1488, 05, 13]
14. and they ferde as thow they **wolde** not **haue medylde** wyth them [TO JOHN PASTON III 1488, 05, 13]
15. he **had wretyn** onto yow but he had non aunswere [TO JOHN PASTON III 1488, 05, 13]



16. Inasmoch as it **hath liked** God to sende vs good tidinges oute of Bretayn [TO JOHN PASTON III, SENDING COPY OF A LETTER FROM HENRY VII TO THE EARL OF OXFORD 1489, 04]
17. Th'inhabitauntes a-bought Brest **haue layd** siege thereunto, and **goten** the base courte of the Frenshmen [TO JOHN PASTON III, SENDING COPY OF A LETTER FROM HENRY VII TO THE EARL OF OXFORD 1489, 04]
18. and that oure said armee, blessid be God, **hath** among theyme-self **kepte** such love and accorde that no maner of fray or debate hath bene bitwene theym sithens the tyme of thair departing out this oure reame. [TO JOHN PASTON III, SENDING COPY OF A LETTER FROM HENRY VII TO THE EARL OF OXFORD 1489, 04]
19. Howbeyt they **haue made** proclamacions in þe cuntrey to mete wyth oder of ther affynyté as on Tuesday last past [TO JOHN PASTON III 1489, 05, 06-10]
20. He sent my lorde be a seruaunt of hys xl li. to **haue excusyd** hym, and it wolde not be takyn; [TO JOHN PASTON III 1489, 05, 06-10]
21. he schewyd hym yowre chargys þat ye **haue had**. [TO JOHN PASTON III 1489, 05, 06-10]
22. Syr Emonde Bedyngfeld, Syr Thomas Tyrell, and Syr Rychard Lewes haue ben wyth my lorde, and yche of them **haue offyrde** to mete wyth my lorde at Cambrýge wyth xxx men apese of them [TO JOHN PASTON III 1489, 05, 06-10]
23. and he scheythe non othyrwyse but as I **haue wretyn** here afore in thys lettyr [TO JOHN PASTON III 1489, 05, 06-10]
24. And I truste we **schal haue done** or xx days to an ende, wyth þe grace of God [TO JOHN PASTON III 1489, 05, 06-10]
25. my cosyn John Heydon woll geue me hys entrest in that hors if the Abot **haue bowght** hym [TO JOHN PASTON III 1492, 02, 18]
26. and if he **haue not bowght** hym [TO JOHN PASTON III 1492, 02, 18]
27. Syr, as towardys my jurney to Caleys, the whyche I entende to **haue tane** at my laste beyng wyth yow, jt was so I was dysapoyntyd of Thomas Dey and an
28. other man I scholde **haue had** be hys menys [TO JOHN PASTON III 1492, 02, 18]
29. as ye **haue had** knowlege of or now [TO JOHN PASTON III 1492, 02, 18]
30. And also I had went to **haue had** folkys a mette wyth me at Hedyngham whyche dednott. [TO JOHN PASTON III 1492, 02, 18]
31. my lorde **hathe ben** wyth the Kynge in Wyndesour at Seynt Georgys Feste [TO JOHN PASTON III 1488, 05, 13]

32. in hope þat they **schuld haue ben** lycensyd to haue gone ouer [TO JOHN PASTON III 1488, 05, 13]
33. and that oure said armee, blessid be God, hath among theyme-self kepte such love and accorde that no maner of fray or debate **hath bene** bitwene theym sithens the tyme of thair departing out this oure reame. [TO JOHN PASTON III, SENDING COPY OF A LETTER FROM HENRY VII TO THE EARL OF OXFORD 1489, 04]
34. Syr Emonde Bedyngfeld, Syr Thomas Tyrell, and Syr Rychard Lewes **haue ben** wyth my lorde, and yche of them haue offyrde to mete wyth my lorde at Cambryge wyth xxx men apese of them [TO JOHN PASTON III 1489, 05, 06-10]
35. It is soo that he and I bothe **haue ben** in hande wyth my vnkyll for hys mater [TO JOHN PASTON III 1492, 02, 18]

#### HAVE-PERFECTS WITH INTRANSITIVES

1. where as it was seyde that my lord Woddevyle and other **schulde haue gone** ouer into Breten to haue eyded the Duke of Breten [TO JOHN PASTON III 1488, 05, 13]
2. and soo whan he was countyrmaundyd thos that resortyd thedyr to **haue gon** ouer wyth hym taryde there styll, [TO JOHN PASTON III 1488, 05, 13]
3. And they **had** nott **seylyd** not paste vj legys butt they aspiad a Frencheman [TO JOHN PASTON III 1488, 05, 13]
4. in hope þat they schuld haue ben lycensyd to **haue gone** ouer [TO JOHN PASTON III 1488, 05, 13]
5. And also I **had went** to haue had folkys a mette wyth me at Hedyngham whyche dednott. [TO JOHN PASTON III 1492, 02, 18] [problematic]
6. how that I was sore disesyd, notwythestondyng I was welewyllyd to **haue come** to fulfyll my promesse [TO JOHN PASTON III 1492, 02, 18]

#### MODAL AND CAUSATIVE HAVE

1. And where as 3e requere to **haue** it **grauntyd** wyth-owt fyne or fee, I wold 3e had it wyth the payment of þe fyne or fee [TO JOHN PASTON III 1487, 00, 307]
2. And he **had** many lordys and gentylmen **to aunswere** for hys trowthe and hys demenyng afore-tyme [TO JOHN PASTON III 1487, 00, 307]
3. Also he schewyd me that Herry Wyott wholde fynde the mene to **haue** yow **condemnyd** and recouer þe obligacion of xl li. ageyns yow. [TO JOHN PASTON III 1488, 05, 13]
4. And also I had went to haue **had** folkys a **mette** wyth me at Hedyngham whyche dednott. [TO JOHN PASTON III 1492, 02, 18]

### BE-PERFECTS WITH MUTATIVE INTRANSITIVES

1. there was ij c of them that gete them in-to a Breten schyppe þe whyche **was** late **come** ouer wyth salte [TO JOHN PASTON III 1488, 05, 13]
2. we wryte vnto you of them as thay ['i.e. tidings'] **be comen** to oure knowlage, and as foloueth. [TO JOHN PASTON III, SENDING COPY OF A LETTER FROM HENRY VII TO THE EARL OF OXFORD 1489, 04]
3. And where as ye desyre that I schulde sende yow worde of suche tydyng as Phylp Lewes and Wyndesor bryngythe fro the corte, they **be come** thens bothe [TO JOHN PASTON III 1489, 05, 06-10]
4. and Phylp Lewes **is redyn** ageyn to the Kyng, and schall brynge wyth hym money for all ther wagys that schall be in my lordys retynnew [TO JOHN PASTON III 1489, 05, 06-10]

### PROGRESSIVES

1. Sche **is** not **a-bydyng**e ther sche ys now, hyr dwellyng is in London [TO JOHN PASTON III 1479, 02, 23]
2. for he **is** in a manere **departyng** owt of my seruyse [TO THE BAILIFF OF MAUTBY 1487]
3. hys tentys and alys **be a-makyng** faste and many of them be made. [TO JOHN PASTON III 1492, 02, 18]
4. soo that be lykelyod hys grace **wolbe goyng** sone vpon Ester. [TO JOHN PASTON III 1492, 02, 18]

### MODAL BE

1. ye be xxii s. in hys dette, for a monthe **was to pay** for when [deleted in MS] he had mony laste [TO JOHN PASTON III 1478, 11, 07]

### PASSIVES

1. To hys worchepful brodyr John Paston **be** thys **delyuered** in hast. [TO JOHN PASTON III 1478, 11, 07]
2. To his worchepfull broder John Paston **be** thys **delyuered** in hast. [TO JOHN PASTON III 1479, 02, 23]
3. whyche 3e send by a jentylmannys man for my borde, cawlyd Thomas Newton, **was delyuered** to myn hostes [TO JOHN PASTON III 1479, 02, 23]
4. for and if it be as it **is tolde** me sche is dysposyd to be thyke. [TO JOHN PASTON III 1479, 02, 23]

5. To hys right worchepfull brodyr Edmunde Paston **be** thys lettyr **delyueryd**. [TO EDMOND PASTON II 1480, 02, 22]
6. whyche is to me and to my heyers malys as **is specyfyed** in the wyll. [TO EDMOND PASTON II 1480, 02, 22]
7. Paston **be** thys ... [unclear] **yuered**. [TO JOHN PASTON III 1487, 00, 307]
8. ther is non clawse in it wherby it **scholde be grauntyd** wyth-owt fyne or fee [TO JOHN PASTON III 1487, 00, 307]
9. and thow ther were it **is tolde** me it profyte nott [TO JOHN PASTON III 1487, 00, 307]
10. he aunswerde me that he wott well ther **schall be non grauntyd** of a gode whyle [TO JOHN PASTON III 1487, 00, 307]
11. for I tolde hym how that 3e **were begylyd** whan 3e were at London. [TO JOHN PASTON III 1487, 00, 307]
12. and he is lyke to **be hanged** [TO JOHN PASTON III 1487, 00, 307]
13. Also Edwarde Hecstowe of Douere **is apechyd** of treson of many straunge poyntys [TO JOHN PASTON III 1487, 00, 307]
14. and then they **were takyn** apert and he hym-sylfe confessyd it [TO JOHN PASTON III 1487, 00, 307]
15. and many other thyngys more than he **was accusyd** of. [TO JOHN PASTON III 1487, 00, 307]
16. that þe towne **shalbe dronkyn** drye as Yorke was [unclear] whan the Kynge was there. [TO JOHN PASTON III 1487, 00, 307]
17. Your contré **is** gretely **bostyd** of, and also the jnabytours of þe same [TO JOHN PASTON III 1487, 00, 307]
18. And if Bayard **be on-solde** I pray yow late hym **be made** fatte ageyns the
19. Kynge come in-to the contré, what so euer I pay for the kepyng of hym. [TO THE BAILIFF OF MAUTBY 1487]
20. To Syr John Paston **be** thys lettyr **delyuered**. [TO JOHN PASTON III 1488, 05, 13]
21. where as it **was seyde** that my lord Woddevyle and other schulde haue gone ouer in-to Breten to haue eyded the Duke of Breten [TO JOHN PASTON III 1488, 05, 13]
22. where it **was seyde** that he schulde haue takyn schyppynge to haue waytyd vpon hym ouer [TO JOHN PASTON III 1488, 05, 13]

23. and soo whan he **was countyrmaundyd** thos that resortyd thedyr to haue gon ouer wyth hym taryde there styll, [TO JOHN PASTON III 1488, 05, 13]
24. in hope þat they schuld haue **ben lycensyd** to haue gone ouer [TO JOHN PASTON III 1488, 05, 13]
25. Also ther was ther an jnbacetour fro the Kynge of Schottys who **is** now **put** in grete trobyll be hys son and other of the lordys of hys londe [TO JOHN PASTON III 1488, 05, 13]
26. and be-cause he was of Bretayn borne and favorable to that partie we ne gave such trust to his tidinges as **was thought** to vs sureté to wryte to you theruppon [TO JOHN PASTON III, SENDING COPY OF A LETTER FROM HENRY VII TO THE EARL OF OXFORD 1489, 04]
27. and **was receiued** wyth procession, **logged** and **receiued**, **refreshed** in the town iiij dayes [TO JOHN PASTON III, SENDING COPY OF A LETTER FROM HENRY VII TO THE EARL OF OXFORD 1489, 04]
28. The garnison of the towne of Concarnewe, which is oon of the grettest strengthes of all Bretayn, **was besieged** in like wyse and **drevyn** to that necessité that thei wyth-in offerid [TO JOHN PASTON III, SENDING COPY OF A LETTER FROM HENRY VII TO THE EARL OF OXFORD 1489, 04]
29. How that **is takyn** or what **is** more **done** sithens he cannot telle. [TO JOHN PASTON III, SENDING COPY OF A LETTER FROM HENRY VII TO THE EARL OF OXFORD 1489, 04]
30. **PASTON III, SENDING COPY OF A LETTER FROM HENRY VII TO THE EARL OF OXFORD 1489, 04]**
31. þe place where as thys onhappy dede **was done** [TO JOHN PASTON III 1489, 05, 06-10]
32. but Clopton wolde not it **schulde be knowen** of non other but yourselfe. [TO JOHN PASTON III 1489, 05, 06-10]
33. He sent my lorde be a seruaunt of hys xl li. to haue excusyd hym, and it **wolde not be takyn**; [TO JOHN PASTON III 1489, 05, 06-10]
34. To **be knowyn** to all the Northe partys of England to euery lorde [TO JOHN PASTON III 1489, 05, 06-10]
35. And thys to **be fulfyllyd** and **kept** by euery ylke comenere apon peyn of dethe. [TO JOHN PASTON III 1489, 05, 06-10]
36. Syr Herry Heydon schewyd me that it **is agreyd** be Syr Edmond Bedyngfeld
37. that the mater betwyx hym and my brodyr Yeluerton **shalbe comynd** at
38. Norwyche, and there a dyreccion to **be takyn** in the same mater mete for them bothe. [TO JOHN PASTON III 1492, 02, 18]
39. hys tentys and alys be a-makyng faste and many of them **be made**. [TO JOHN PASTON III 1492, 02, 18]

#### AMBIGUITY BETWEEN PASSIVE AND STATIVE

1. And as for the mony and plate, it is redy when soo euer sche **were weddyd**; [TO JOHN PASTON III 1479, 02, 23]
2. for and if it be as it is tolde me sche **is dysposyd** to be thyke. [TO JOHN PASTON III 1479, 02, 23]
3. and þat they **be** well **apoyntyd** [TO JOHN PASTON III 1487, 00, 307]
4. that he **schall be comittyd** to þe Flete [TO JOHN PASTON III 1488, 05, 13]
5. and be-cause he **was** of Bretayn **borne** and favorable to that partie we ne gave such trust to his tidinges as was thought to vs sureté to wryte to you theruppon [TO JOHN PASTON III, SENDING COPY OF A LETTER FROM HENRY VII TO THE EARL OF OXFORD 1489, 04]
6. The castell of Chawson adioyn [deleted in MS]ing ner to the towne of Saynt Bryak **was** also **garnisond** wyth Frenshmen [TO JOHN PASTON III, SENDING COPY OF A LETTER FROM HENRY VII TO THE EARL OF OXFORD 1489, 04]
7. And the townes of Henebone and Vannes **were garnisond** wyth Frenshmen [TO JOHN PASTON III, SENDING COPY OF A LETTER FROM HENRY VII TO THE EARL OF OXFORD 1489, 04]
8. and thatoure said armee, **blessid be** God, hath among theyme-self keppe such love and accorde that no maner of fray or debate hath bene bitwene theym sithens the tyme of thair departing out thisoure reame. [TO JOHN PASTON III, SENDING COPY OF A LETTER FROM HENRY VII TO THE EARL OF OXFORD 1489, 04]
9. My bedfelawe Cornwaleys **is maryed** in the northe, and he came as yesternyght to my lorde [TO JOHN PASTON III 1489, 05, 06-10]
10. Syr, I **am** as yet no bettyr **horsyd** than I was whan I was wythe yow [TO JOHN PASTON III 1492, 02, 18]
11. Syr, as towardys my jurney to Caleys, the whyche I entende to haue tane at my laste beyng wyth yow, jt was so I **was dysapoyntyd** of Thomas Dey and an other man I scholde haue had be hys menys [TO JOHN PASTON III 1492, 02, 18]
12. how that I **was** sore **disesyd**, notwythestondyng I **was welewylyd** to haue
13. come to fulfyll my promesse, but he cowde not sofyr me seyng me soo dysesyd. [TO JOHN PASTON III 1492, 02, 18]
14. Aftyр all dewtés of recomendacion I recomaunde me on-to yow, letyngе yow wett that here **is closid** in thys same byll the wyll of my fadyr [TO EDMOND PASTON II 1480, 02, 22]

15. My lorde seyde ye myght haue men a-nowe, and ther wagys **schalbe payd** for. [TO JOHN PASTON III 1489, 05, 06-10]

16. my costys **schalbe payd** fore. [TO JOHN PASTON III 1492, 02, 18]

#### AMBIGUITY BETWEEN *BE*-PERFECT AND PASSIVE OR STATIVE

1. latynge yow wete that, as for John Petyrsons mater, as zett it **is** nott **spedde**. [TO JOHN PASTON III 1487, 00, 307]
2. As for my lord Treserer, he was not wyth the Kyng of all the counsell tyme, þe whyche **was endyd** on the iijde day of Marche. [TO JOHN PASTON III 1487, 00, 307]
3. my cosyn John Heydon tolde me that þe Prior of Waburnes horse **was** rially **amendyd**, and that þe Abott of Seynt Benetys schewed hym ther was a bay hors off a parsons nygh onto Seynt Benetis [TO JOHN PASTON III 1492, 02, 18]

#### MISSING AUXILIARY

1. And if Bayard be on-solde I pray yow late hym be made fatte ageyns the Kyng **come** in-to the contré, what so euer I pay for the kepyng of hym. [TO THE BAILIFF OF MAUTBY 1487]
2. The Lord Malpertuis, now late wyth vs in ambassade from oure dere cousine the Duchesse of Bretayne, **shippid** at oure porte of Dortmouth and **arriued** at Saynt Powle de Lyon in Bretayn on Palmesonday at iiij aftere noone [TO JOHN PASTON III, SENDING COPY OF A LETTER FROM HENRY VII TO THE EARL OF OXFORD 1489, 04]

#### 'S CONTRACTION
