# Supplementary material
Source: publisher figshare collection journal article supplement (https://brill.figshare.com/articles/dataset/_/9675644)
Supplement: Supplementary file 5 [file 1]

## APPENDIX 6: *THE COUNTRY WIFE*

Sources: Salgādo (1968a);

<http://quod.lib.umich.edu/e/eebodemo/ALJ0561.0001.001/1:4.1?rgn=div2;view=fulltext>

(accessed on 09 August 2016)

Page numbers refer to Salgādo's (1968a) edition.

Following Salgādo's (1968a) edition, the spelling has been modernised.

Only the first two acts have been examined.

Word count: approx. 10,083 words (based on  
<http://quod.lib.umich.edu/e/eebodemo/ALJ0561.0001.001/1:4.2?rgn=div2;view=fulltext>,  
accessed on 11 August 2016)

### HAVE-PERFECTS WITH TRANSITIVES

(incl. prepositional objects, implied/unexpressed objects, and copula and auxiliary *be*)

1. Poets, like cudgelled bullies, never do  
At first or second blow submit to you;  
But will provoke you still, and ne'er **have done**,  
Till you are weary first with laying on. [Prologue, p.149]
2. But though our Bayes's battles oft I've **fought**,  
And with bruised knuckles their dear conquests **bought** [Prologue, p. 149]
3. Well, my dear Doctor, **hast** thou **done** what I desired? [I.i, p. 153]
4. I **have undone** you forever with the women, and **reported** you throughout the whole
5. town [...] as a eunuch, with as much trouble as if I **had made** you one in earnest. [I.i, p. 153]
6. But **have** you **told** all the midwives you know [...] [I.i, p. 153]
7. I **have told** all the chambermaids, waiting women, tire-women [...] [I.i, p. 153]
8. an English-French chirurgion, who **has given** me at once not only a cure but an  
antidote [...] [I.i, p. 153]
9. Your late journey into France **has made** it the more credible [I.i, p. 154]
10. I **have taken** my eternal leave, sir, of the sex already, sir. [I.i, p. 155]
11. I **have brought** over not so much as a bawdy picture [I.i, p. 155]
12. Now I think, I, or you yourself rather, **have done** your business with the women. [I.i, p. 157]
13. your appearance at the play yesterday **has**, I hope, **hardened** you for the future [I.i, p. 158]
14. I **have left** at Whitehall an earl to dine with you [I.i, p. 162]
15. I thought thou **hadst loved** a man [I.i, p. 162]

16. I thought to **have concealed** it from him at least [I.i, p. 163]
17. Why, I **have married** no London wife. [I.i, p. 163]
18. Come, come, I **have known** a clap gotten in Wales [I.i, p. 164]
19. He's come newly to town it seems, and **has** not **heard** how things are with him. [I.i, p. 165]
20. But tell me, **has** marriage **cured** thee of whoring [I.i, p. 165]
21. Nay, I **have known** 'em [I.i, p. 165]
22. Hell and damnation, I'm undone, since Horner **has seen** her [I.i, p. 166]
23. Who **has nangered** thee? [II.i, p. 169]
24. What lampoon **has made** my name notorious? [II.i, p. 169]
25. The fool **has forbid** me discovering to her the pleasures of the town, and he is now setting her agog upon them himself. [II.i, p. 170]
26. for he would but ruin you, as he **has done** hundreds [II.i, p. 171]
27. Thou **hast stared** upon her enough to resolve me. [II.i, p. 172]
28. Sir, Master Sparkish **has** often **told** me that his acquaintance were all wits and railleurs ['banterers'] [II.i, p. 172]
29. and till now I never thought I **should have envied** you or any man about to marry [II.i, p. 172]
30. now you **have put** a scruple in my head [II.i, p. 174]
31. Madam, you would not have been so little generous as to **have told** him. [II.i. p. 175]
32. I will not see Sir Jasper here till I **have waited** upon him at home; nor shall my
33. wife see you till she **has waited** upon your ladyship at your lodgings. [II.i, p. 177]
34. She **has locked** the door and is gone abroad. [II.i, p. 177]
35. No, you **have locked** the door, and she's within. [II.i, p. 177]
36. No, no, we **have** all **had** 'em. [II.i, p. 177]
37. I **have known** men admired, courted, and followed for their titles only. [II.i, p. 178]

38. to report a man **has had** a person, when he **has** not **had** a person, is the greatest wrong
39. in the whole world that can be done to a person. [II.i, p. 179]
40. for when you **have lost** your money to a man, you'll lose anything you have [II.i, p. 183]
41. I **have provided** an innocent playfellow for you there. [II.i, p. 183]
42. I **have given** you security already to save you harmless, my late reputation being so well known in the world, madam. [II.i, p. 184]
43. Come, is your ladyship reconciled to him yet? **Have** you **agreed** on matters? For I must be gone to Whitehall. [II.i, p. 184]
44. and I would as soon have lain with him, as **have named** him. [II.i, p. 185]
45. Well, I **have been** hired by young gallants [I.i, p. 154]
46. and so my disaster, sir, **has been** my good fortune, sir [I.i, p. 155]
47. Who, by his breeding, would think he **had** ever **been** in France? [I.i, p. 155]
48. and **has been** there a fortnight [I.i, p. 161]
49. know what her keeping **has been** [I.i, p. 164]
50. What dost thou blush at nine and forty, for **having been** seen with a wench? [I.i, p. 166]
51. Madam, you would not **have been** so little generous as to have told him. [II.i. p. 175]
52. besides he **has been** making love to me. [II.i, p. 175]

#### AMBIGUOUS HAVE-PERFECT

1. Who for his business from his wife will run,  
Takes the best care, to **have** her business **done**. [II.i, p. 185]

#### HAVE-PERFECTS WITH INTRANSITIVES

1. PINCHWIFE: I **have dined** already.  
HORNER: Come, I know thou **hast** not. [I.i, p. 166]
2. but I **would have ventured** for all that. [II.i, p. 168]
3. I've **gone** too far, and **slipped** before I was aware [II.i, p. 171]
4. and I would as soon **have lain** with him, as have named him. [II.i, p. 185]

#### MODAL AND CAUSATIVE HAVE

1. and he **had better employ** her, than let her employ herself [I.i, p. 156]
2. Well, I see one **had** as good **go** to law without a witness, as break a jest without a laughter on one's side. [I.i, p. 162]
3. SIR JASPER: Well, well, in short I have business at Whitehall, and cannot go to the play with you, therefore would **have** you **go** –  
LADY FIDGET: With those two to a play? [II.i, p. 180]
4. So, so, why, 'tis as I'd **have** it. [II.i, p. 185]
5. And as I'd **have** it. [II.i, p. 185]

#### BE-PERFECTS WITH MUTATIVE INTRANSITIVES

1. LADY FIDGET: Pray, Sir Jasper, let us **be gone** from this rude fellow. [I.i, p. 155]
2. But pray, let's **be gone**. [I.i, p. 155]
3. Why do we stay? Let's **be gone**; I can't indure the sight of him. [I.i, 156]
4. I can be sure she that shews an aversion to me loves the sport, as those women that **are gone**, whom I warrant to be right [I.i, p. 157]
5. Harcourt, let's **be gone** to the new play. —Come, madam. [II.i, p. 176]
6. We **are come** to wait upon her to the new play. [II.i, p. 177]
7. She has locked the door and **is gone** abroad. [II.i, p. 177]
8. Do not be frightened; but pray, **be gone** ladies. [II.i, p. 177]
9. Fie, fie upon 'em! They **are come** to think cross breeding for themselves best, as well as for their dogs and horses. [II.i, p. 178]
10. So the little fellow **is grown** a private person with her. [II.i, p. 179]
11. and it **is come** to that pass, we dare not take your words, no more than your tailor's, without some staid servant of yours be bound with you [II.i, p. 184]
12. Come, is your ladyship reconciled to him yet? Have you agreed on matters? For I must **be gone** to Whitehall. [II.i, p. 184]

#### PROGRESSIVES

1. Horner's **coming** to carry you away. [I.i, p. 153]
2. I **was discoursing** and **rallying** with some ladies yesterday [I.i, p. 161]
3. But **were** you not **talking** of plays and players when I came in? [II.i, p. 170]

4. The fool has forbid me discovering to her the pleasures of the town, and he **is** now **setting** her agog upon them himself. [II.i, p. 170]
5. besides he has **been making** love to me. [II.i, p. 175]

### MODAL BE

1. Shy husbands and keepers like old rooks [‘swindlers’] **are not to be** cheated, but by a new unpractised trick [I.i, p. 154]
2. Well, but **am I to give** thee joy [I.i, p. 163]
3. Why, the next thing that **is to be** heard is, thou’rt a cuckold. [I.i, p. 163]
4. Do not teach my wife where the men **are to be** found. [II.i, p. 169]
5. This is one of those, my pretty rogue, that **are to dance** at your wedding tomorrow [II.i, p. 172]

### PASSIVES

1. I am only afraid ‘**twill not be believed**. [I.i, p. 153]
2. Well, I have **been hired** by young gallants [I.i, p. 154]
3. but you are the first **would be thought** a man unfit for women [I.i, p. 154]
4. Dear Mr. Doctor, let vain rogues be contented only to **be thought** abler men than they are. [I.i, p. 154]
5. a good name **is** seldom **got** by giving it oneself, and women no more than
6. honour **are compassed** by bragging. [I.i, p. 154]
7. Shy husbands and keepers like old rooks [swindlers] are not to **be cheated** [I.i, p. 154]
8. Some unbelieving sisters of my former acquaintance, who I am afraid expect their sense **should be satisfied** of the falsity of the report. [I.i, p. 154]
9. **Won’t you be acquainted** with her, sir? [I.i, p. 155]
10. a woman **is hated** by ‘em as much for loving her husband as for loving their money [I.i, p. 155]
11. Business **must be preferred** always before love and ceremony [I.i, p. 156]
12. wife, who before **would not be acquainted** with me out of jealousy [I.i, p. 157]
13. First, I **shall be rid** of all my old acquaintances [I.i, p. 157]

14. and of all old debts, love, when it comes to be so, **is paid** the most unwillingly [I.i, p. 157]
15. and **be seen** in a lady's chamber [I.i, p. 158]
16. but all that deal with common women **should be served** so [I.i, p. 158]
17. old *beaux garçons*, who, like superannuated stallions, **are suffered** to run, feed, and whinny with the mares [I.i, p. 159]
18. as a false jewel amongst true ones **is not discerned** at a distance [I.i, p. 160]
19. Nay, they **are used** like rooks too, **snubbed, checked and abused** [I.i, p. 160]
20. we are your friends, and will not take it ill to **be left**, I do assure you. [I.i, p. 162]
21. Why, the next thing that is to **be heard** is, thou'rt a cuckold. [I.i, p. 163]
22. to go and **be cheated** by a friend in the country [I.i, p. 163]
23. Then methinks you should bring her, **to be taught** breeding. [I.i, p. 164]
24. To **be taught**? [I.i, p. 164]
25. I sate there that she **might not be seen** [I.i, p. 166]
26. What dost thou blush at nine and forty, for having **been seen** with a wench? [I.i, p. 166]
27. for men are now more ashamed to **be seen** with them in public [I.i, p. 166]
28. Do not teach my wife where the men are to **be found**. [II.i, p. 169]
29. I think that **was** prettily **said** of me, ha, Harcourt? [II.i, p. 173]
30. The writings **are drawn**, sir, settlements **made** [II.i, p. 174]
31. and you **would be thought** in necessity for a cloak [II.i, p. 175]
32. made love to me only to **be satisfied** of my virtue, for your sake [II.i, p. 176]
33. if I sate in the box, I **should be thought** no judge [II.i, p. 177]
34. 'Tis an errant shame women of quality **should be** so **slighted** [II.i, p. 178]
35. that we **should be** only **wronged** by 'em [II.i, p. 179]
36. to report a man has had a person, when he has not had a person, is the greatest wrong in the whole world that **can be done** to a person. [II.i, p. 179]

37. Well, 'tis an arrant shame noble persons **should be** so **wronged** and **neglected**. [II.i, p. 179]
38. and the crime's the less when 'tis not **known**. [II.i, p. 179]
39. I **will** not **be seen** in women's company in public again for the world. [II.i, p. 180]
40. 'Tis a greater shame amongst lewd fellows to **be seen** in virtuous women's
41. company than for the women to **be seen** with them. [II.i, p. 181]
42. we **would** not **be troubled** with you [II.i, p. 181]
43. 'Tis strange a man can't come amongst virtuous women now but upon the same terms as men **are admitted** into the Great Turk's Seraglio. [II.i, p. 181]
44. lest sometimes you **should be forced** to stay at home [II.i, p. 182]
45. And so go to her, begin thy new employment. Wheedle her, jest with her, and **be** better **acquainted** one with another. [II.i, p. 183]
46. to cause yourself to **be reported** no man [II.i, p. 184]
47. I desire to **be tried** only, madam. [II.i, p. 184]
48. Well, that's **spoken** again like a man of honour [II.i, p. 184]
49. If I did, nobody would believe me. The reputation of impotency **is** as hardly **recovered** again in the world as that of cowardice, dear madam. [II.i, p. 184]
50. Come, **is** your ladyship **reconciled** to him yet? Have you agreed on matters? For I must be gone to Whitehall. [II.i, p. 184]

#### AMBIGUITY BETWEEN PASSIVE AND STATIVE

1. Dear Mr. Doctor, let vain rogues **be contented** only to be thought abler men than they are. [I.i, p. 154]
2. the Council **will be sate**, I must away [I.i, p. 156]
3. Nay, by this means you **may be** the more **acquainted** with the husbands, but the less with the wives. [I.i, p. 157]
4. And next to the pleasure of making a new mistress is that of **being rid** of an old one [I.i, p. 157]
5. Well, you **may be** so **rid** of your old acquaintances, but how will you get any new ones? [I.i, p. 157]
6. 'tis a very hard thing to **be rid** of him [I.i, p. 160]

7. We **will be bound** in ten thousand pound bond [I.i, p. 161]
8. I heard thou **wert married** [I.i, p. 163]
9. Hell and damnation, I'**m undone**, since Horner has seen her [I.i, p. 166]
10. I'**m satisfied** you are of the society of the wits and railleurs ['banterers'] [II.i, p. 173]
11. and are cuckolds before they'**re married** [II.i, p. 177]
12. since wives **are** so **neglected** [II.i, p. 178]
13. as if we **were** all **married** to 'em [II.i, p. 178]
14. and it is come to that pass, we dare not take your words, no more than your tailor's, without some staid servant of yours **be bound** with you [II.i, p. 184]
15. I have given you security already to save you harmless, my late reputation **being** so well **known** in the world, madam. [II.i, p. 184]

#### AMBIGUITY BETWEEN BE-PERFECT AND PASSIVE OR STATIVE

1. Hold, do not rail at him, for since he is like ['likely?'] to be my husband, I **am resolved** to like him. Nay, I think I am obliged to tell him you are not his friend. [II.i, p. 175]

#### MISSING AUXILIARY

1. for you look upon a friend married as one **gone** into a monastery, that is, dead to the world [II.i, p. 173]
2. my wife has just now the smallpox **come** out upon her [II.i, p. 177]

#### 'S CONTRACTION

1. the vizard-masks ['prostitutes'], you know, never pitty a man when all's **gone** [I.i, p. 158]
2. He's **come** newly to town it seems, and has not heard how things are with him. [I.i, p. 165]
