# Supplementary material
Source: publisher figshare collection journal article supplement (https://brill.figshare.com/articles/dataset/_/9675644)
Supplement: Supplementary file 7 [file 1]

## APPENDIX 12: A SLAVONIC-BULGARIAN HISTORY (1762)

Bulgarian: *История славянобългарска/Istoriija slavyanobălgarska*

Sources: Peev et al. (2015); [http://histdict.uni-sofia.bg/textcorpus/show/doc\\_137](http://histdict.uni-sofia.bg/textcorpus/show/doc_137) (accessed on 11 April 2017)

Only the Preface examined (up to folio 5v)

Word count: approx. 1,999 words (based on [http://histdict.uni-sofia.bg/textcorpus/show/doc\\_137](http://histdict.uni-sofia.bg/textcorpus/show/doc_137), accessed on 11 April 2017)

### PERFECTS

1. како са испрво поживели и пренишли [f. 3r, l. 14-15]
2. 'how they originally lived and passed away'
3. или не са имали болгарни црство и господство (!) за толико лета црствували и били
4. славни и чюени по сва земаа и много пүти ѿ силни римляне и ѿ мудри грци данъ
5. възимали и давали имъ царовѣ и кралеве свои царски дъщери въ супружесво [f. 3v, l. 16-21]
6. 'Or didn't the Bulgarians have a kingdom and a state, reigning for so many years,
7. known and famous all over the world, and on multiple occasions the powerful Romans and the wise Greeks paid them tribute, and kings and emperors gave them their royal daughters as wives'
8. ѿни правѣдни правци сви са били землоделатели и ѿвчаре и били богати съ съкоти
9. и с плоди земани и били прости на земли и незлобиви [f. 4v, l. 16-19]
10. 'the righteous forefathers were all farmers and shepherds and were rich in livestock and the fruits of the earth and they were simple [men] on earth and meek'
11. не са били наши болгарски царове и патриарси и архіереи безъ летописни книги [f. 5r, l. 9-11]
11. 'our Bulgarian kings, patriarchs and clergymen did have chronicles'
12. за толико лета црствували и господствували на земли имали са исторни царски и кондичи архіеренски све извесно и житија и правила за стѣхъ болгарски. многи [f. 5r, l. 11-14]
12. 'they reigned and ruled on earth for so many years and had royal histories and clerical annals on everything in detail, as well as lives and canons for many Bulgarian saints'
13. и нинѣ не има ѿни книги и летописни що са били пространо написани ради своего народа [f. 5v, l. 2-4]
13. 'now those chronicles don't exist which were written in detail on account of the entire nation...'
14. едва се наиде нихни имена и кон по коєго є црствувалъ [f. 5v, l. 10]
14. 'one could hardly find their names and who reigned after whom'
15. писали како є нимъ било прилично [f. 5v, l. 14-15]
15. 'they wrote as it suited them'

## EVIDENTIALS (-L PARTICIPLE WITH MISSING AUXILIARY)

1. въ кратце то изави́лъ василіа кесаръ вѣсточниі сѣну своему лѣву премудрому оувѣщава-е-го глаголетъ історію рече [f. 2r, l. 8-10]  
'that is what, in short, the eastern Emperor Basil told his son Leo the Wise; counselling him, he says "History, he spoke,..."'
2. и ѿ всѣго славѣнскаго народа наі славні били болгарі прво се ѿні царовѣ нарекли
3. прво ѿні патріарха имели прво се ѿні крстили наі боле земля ѿні ѡсвоили тако ѿ
4. сего народа славѣнскаго наі силні и чесні били и прві светі славѣнскі ѿ болгарскі
5. родъ и іазикъ просіалъ. како за то по редѣ. све. въ сию історію написахъ [f. 4r, l. 1-7]
6. 'of all the Slavonic peoples the Bulgarians were most glorious; they were the first
7. ones to proclaim kings, they were the first ones to have a patriarch, they were
8. Christianised first and they conquered the greatest amount of land; thus, of all the Slavonic nations, they were most powerful and most venerated, and the first Slavonic saint came shining from the Bulgarian race and tongue, as I wrote about all of that in turn in this book'
9. наі прво нѣхъ взлюбилъ на земли и прославилъ [f. 5r, l. 1]
10. '[God] first came to love and glorify them [the ploughmen and shepherds] on earth'
11. за толико лѣта црствували и господсвували на земли имали са історіи царскі и кондичі архіерейскі све ізвесно і житія и правіла за стѣихъ болгарскі. многи [f. 5r, l. 11-14]
12. 'they reigned and ruled on earth for so many years and had royal histories and clerical annals on everything in detail, as well as lives and canons for many Bulgarian saints'
13. но не било въ ѿно време щамбні славѣнскі а чловѣци ѿ небреженіе не преписували
14. на мало се места таквіа кніги ввертало [f. 5r, l. 15-17]
15. 'but there weren't any Slavonic printing presses at that time, and people were careless and didn't copy [them], so such books were to be found at very few places'
16. а кога узели тѣрци болгарска земля напрасно погазили и попразнили(!) цркві [f. 5r, l. 17-19]
17. 'and when the Turks suddenly captured the Bulgarian land they destroyed and burned the churches...'
19. въ то време чловѣци ѿ страха і ужаса тѣрскаго бегали да сахранатъ такмо свои животъ и ва то лѣто време пѣгубили се ѿні історіи [f. 5r, l. 20-22]
20. 'at that time people were fleeing from the fear and terror of the Turks in order to save their own lives; and in that fierce time those [royal] histories were lost...'
21. некои маврубинъ латининъ преписалъ ѿ грѣчка історіа [f. 5v, l. 8-9]  
'a certain Mavro Orbini, a Latin man, copied from a Greek history'
22. самъ тѣи маврубинъ написалъ тако кажтъ (!) грци ѿ завистъ и ненавистъ що имели на богари (!) [f. 5v, l. 10-12]
23. 'Mavro Orbini wrote himself that the Greeks say so because of the envy and hatred they had against the Bulgarians'

24. не писали хравріє постѹпки [f. 5v, l. 12-13]  
'they didn't describe the heroic deeds...'
25. писали како є нѣмъ вѣло прилично [f. 5v, l. 14-15]  
'they wrote as it suited them'
26. защо гѣ много пѹта болгарѣ побѣждали и данѣ ѿ нѣхъ вѣзѣмали [f. 5v, l. 15-16]
27. 'because the Bulgarians defeated them many times and got tribute from them'

### 'EVIDENTIAL' AORISTS

1. ѿ сѣхъ, иже дѣлаіа мѣра сего писаша [f. 1r, l. 14-15]  
'from those who described the acts of this world'
2. на долгое время писаніа ѿ сѣхъ ѿставиша [f. 1r, l. 16-17]  
'they left long-lasting writings on those things'
3. како гдѣсвѹюшѣхъ (!) и гордецихъ се ѿ народѣхъ іазиѣкъ [...] вѣнезапѹ
4. изнемогоша смириша се падоша погнибоша исчезоша [f. 1v, l. 12-16]
5. '[if you would like to see...] how dominant and proud nations [...] all of a sudden
6. grew weak, became quiet, fell, perished and disappeared...'
- 7.
8. въ кратце то изавѣлѣ василѣа кесарѣ вѣсточниі сѣнѹ своємѹ лѣвѹ премѹдромѹ  
оѹвѣщава-є-го глаголетѣ історію рече [f. 2r, l. 8-10]
9. 'this is what the eastern Emperor Basil told his son Leo the Wise in short; counselling him, he says "History, he spoke,..."'
10. ѿ чesомъ иніи много трудѣша сѣ [f. 2r, l. 12-13]  
'on which others expended a great deal of effort'
11. ѿ адама до давіа [...] колѣко вѣхѣ правѣдні и [...] нарекохѣ се великіи на землі [f. 4v, l. 10-13]
12. 'from Adam to David [...] how many were righteous and [...] called themselves great on earth'
13. и самѣ хрестосѣ оѹ домѣ простаго и нищетнаго іѡсѣфа слезе и поживе [f. 4v, l. 19-20]
14. 'and Jesus himself came down and lived in the home of the simple and poor Joseph'

### CONDITIONALS

1. аки вѣ не радѣлѣ [f. 2v, l. 6]  
'as if he wouldn't care'
2. аки вѣ вѣсеконѣніемъ забвѣніемъ не вѣрегалѣ ѿ насѣ [f. 2v, l. 7-8]  
'as if he had consigned us to everlasting oblivion'
3. да вѣ имѣали мирѣ і лювѣ (!) с царѣ болгарскѣ [f. 3v, l. 22]  
'so that they would have peace and love with the Bulgarian kings'

### BE-PASSIVES/STATIVES

1. и мнѣтъ се намъ зане всеконечно ѡвржѣно бѣистъ ѡ бѣа и забвѣно [f. 2v, l. 14-15]  
‘and it seems to us that it has been forever neglected and forgotten by God’
3. Исторїа славѣноболгарскаа ... събрано и нареждено паисіємъ [f. 3r, l. 1-3]  
‘Slavonic-Bulgarian History [...] compiled and put together by Paisius’
5. и бѣли славни и чѹені по сва зѣмла [f. 3v, l. 18-19]  
‘weren’t they known and famous all over the world’
6. и нѣнѣ не има ѡні кнѣги и летописни що са бѣли пространо написани ради свѣго народа [f. 5v, l. 2-4]  
‘now those chronicles don’t exist which were written in detail on account of the entire nation...’

### DELEXICAL CONSTRUCTIONS, INCL. DELEXICAL, EXISTENTIAL AND DYNAMIC HAVE

1. и имѣте ю да се не погуби [f. 3v, l. 9-10]  
‘and have it (the book) so that it doesn’t get lost’
2. да би имѣли миръ и лювъ [sic] с царѣ болгарскіе [f. 3v, l. 22]  
‘so that they would have peace and love with the Bulgarian kings’
3. и зато имѣютъ болгарі ѡ много історїи свидѣтелсво [f. 4r, l. 7-9]  
‘that’s why the Bulgarians have evidence from many histories’
4. нѣмашъ нікоі привитокъ ѡ грѣчка мѹдростъ [f. 4r, l. 17-18]  
‘you won’t have any benefit from Greek wisdom’
5. сегашни хітрци що гѣ ти имашъ за почѣстъ [f. 4v, l. 14-15]  
‘our own wise guys, whom you hold in high regard’
6. и нѣнѣ не има ѡні кнѣги и летописни що са бѣли пространо написани ради свѣго народа [f. 5v, l. 2-4]  
‘now those chronicles don’t exist which were written in detail on account of the entire nation...’
7. ненавистъ що имѣли на богари [f. 5v, l. 12]  
‘the hatred which they had for the Bulgarians’
8. ако се и находи оу многи кнѣги и історїи по мало и вкратце написано за болгарі но не можѣтъ сваки чловѣкъ имѣти ѡні кнѣги [f. 5v, l. 19-21]  
‘even if there is in many books and histories a little briefly written about the Bulgarians, it is not possible for everyone to have those books’

### Aorists

писа́ша, дарова́?, вѣста́виша, и́знемо́гоша, смири́ша, падо́ша, погни́боша, исче́зюша,  
оу́вѣщава?, рече, труді́ша, написахъ, поревновахъ, съвори́хъ, събрахъ, съвкупі́хъ,  
написахъ, напи́сахъ, помені́хъ, рече?, рече?, би́ха, нареко́ха, слезе, пожи́ве, віде́хъ,  
написахъ, написахъ, прочето́хъ, взыска́хъ, возмо́гохъ, сабрахъ, пораспространи́хъ,  
съвѣкупі́хъ, расуди́хъ, съваку́піхъ

Total: 36

### Imperfects

предава́ше, съвѣраше, укрепла́ше, беше

Total: 4
