# Supplementary material
Source: publisher figshare collection journal article supplement (https://brill.figshare.com/articles/dataset/_/9675644)
Supplement: Supplementary file 8 [file 1]

## APPENDIX 9: LESSING (EIGHTEENTH-CENTURY GERMAN)

### MINNA VON BARNHELM

by GOTTHOLD EPHRAIM LESSING

First published in 1767

Original text from <http://www.gutenberg.org/cache/epub/9187/pg9187.html> (accessed on 12 Nov 2016)

Only first eight scenes examined

Word count: approx. 3,222 words

English translation: MINNA VON BARNHELM, or THE SOLDIER'S FORTUNE

Translated By Ernest Bell

<http://www.gutenberg.org/files/2663/2663-h/2663-h.htm> (accessed on 12 Nov 2016)

#### HAVE-PERFECTS WITH TRANSITIVES AND MODALS

(incl. prepositional objects and implied/unexpressed objects)

1. Wo wird er die Nacht **zugebracht haben**? [I.i]  
'I wonder where he has passed the night?'
2. Was gilt's, der Herr Major ist nicht nach Hause gekommen, und Er **hat** hier auf ihn **gelauert**? [I.ii]  
'What will you bet the Major has not returned home, and you have been keeping watch for him?'
3. Den **hätte** ich aus dem Hause **gestoßen**? auf die Straße **geworfen**? [I.ii]  
'I thrust him from the house into the streets?'
4. Ich **habe** ihm aus Not ein ander Zimmer **einräumen müssen**. [I.ii]  
'I was obliged to have another room prepared for him.'
5. In meinem Leben **hat** mir das noch niemand **gesagt**. [I.ii]  
'Nobody in my life ever told me that before'
6. Da ich aber das Zimmer notwendig brauchte? da ich voraussähe, daß der Herr Major es selbst gutwillig würde **geräumt haben**, wenn wir nur lange auf seine Zurückkunft **hätten warten können**? [I.ii]
7. 'But suppose I really wanted the room and saw beforehand that the Major would willingly have given it up if we could only have waited some time for his return!'
8. **Habe** ich ihm nicht ein anderes Zimmer dafür **eingeräumt**? [I.ii]  
'Have not I given him another room?'
9. Was **habe** ich dir **befohlen**? [I.iii]  
'What did I tell you?'
10. Denn ich bin gewiß versichert, daß Ihre Gnaden keine Ungnade deswegen auf mich **geworfen haben** [I.iii]  
'For I feel quite sure that your honour is not displeased with me in this matter'
11. wenn er Ihnen die Rechnung **bezahlt hat** [I.iii]  
'when he has paid your bill'

12. Ich **habe** immer Ihre Gnaden für einen ordentlichen und vorsichtigen Mann **gehalten** [I.iii]  
 ‘I always considered your honour a methodical and prudent man’
13. Aber dennoch—wenn ich bar Geld in dem Schreibepulte **vermutet hätte** [I.iii]  
 ‘but still, had I supposed there was ready money in the desk’
14. Trotz Galgen und Schwert und Rad **hätte** ich ihn—**hätte** ich ihn mit diesen Händen **erdrosseln**, mit diesen Zähnen **zerreißen wollen**. [I.iv]  
 ‘In spite of gallows, axe, and torture I could... yes, I could have throttled him with these hands, and torn him to pieces with these teeth!’
15. Er **hätte** mich nicht wieder mit Augen **sehen** und seine Bezahlung aus deinen Händen **empfangen sollen**. [I.iv]  
 ‘He should not have seen me again, but have received the amount of his bill from your hands.’
16. Diese **haben** Sie noch nicht **gebraucht**? [I.iv]  
 ‘And you have not used them yet?’
17. Es ist mir doch lieb, daß ich es **erraten habe**. [I.iv]  
 ‘I am very glad that I guessed this.’
18. Sie würden sein letzter Gedanke, Ihr Name der letzte Ton seiner sterbenden Lippen gewesen sein, **hätte** nicht die stärkere Natur dieses traurige Vorrecht für seinen unglücklichen Sohn, für seine unglückliche Gattin **gefordert** [I.vi]  
 ‘You would have been in his last thoughts, your name would have been the last sound on his dying lips, had not natural affection, stronger than friendship, demanded this sad prerogative for his unfortunate son, and his unhappy wife.’
19. Ich **habe** seine Equipage **verkauft** und komme, seine Handschrift einzulösen. [I.vi]  
 ‘I have sold his carriage, and come to redeem his note.’
20. Sie **werden** seine Handschrift **verlegt haben** [I.vi]  
 ‘You have doubtless mislaid his note’
21. Wenn ich sie nicht habe, so ist es ein Beweis, daß ich nie eine **gehabt habe**, oder daß sie getilgt und von mir schon zurückgegeben worden. [I.vi]  
 ‘If I have not got it, it is a proof that I never had it, or that it has been honoured and already returned by me.’
22. er **hat** mich vielmehr als seinen Schuldner **hinterlassen** [I.vi]  
 ‘He has much rather left me in his debt.’
23. Ich **habe** nie etwas **tun können**, mich mit einem Manne abzufinden, der sechs Jahre Glück und Unglück, Ehre und Gefahr mit mir geteilet. [I.vi]  
 ‘I have never been able to do anything to repay a man who shared with me good and ill luck, honour and danger, for six years.’

24. bald **hätte** ich das Wichtigste **vergessen** [I.vi]  
‘I had nearly forgotten that which is of most consequence’
25. Künftige Wohltaten so vorbereiten, heißt sie in den Augen des Himmels schon **erwiesen haben**. [I.vi]  
‘Thus to purpose future good deeds is, in the eyes of heaven, to have performed them already.’
26. Ich **habe** in der Küche meine Rechnung **geschrieben** [I.viii]  
‘I have been writing out my account in the kitchen’
27. Ich **hätte** mir ehr den Tod als meinen Abschied **vermutet**. [I.viii]  
‘I should sooner have expected my death, than my discharge.’
28. Ich kann Ihnen das nicht bezahlen, und wenn Sie mir vollends die Liverei nehmen, die ich auch noch nicht **verdient habe**—so wollte ich lieber, Sie **hätten** mich in dem Lazarette krepieren **lassen**. [I.viii]
29. ‘[...] and if you take my livery from me too, which, by the way, I have not yet earned,—I would rather you had let me die in the workhouse.’
30. Noch **hat** er keinen Bissen Brot aus meiner Hand **bekommen** [I.viii]  
‘I have never yet given him a bit of bread with my own hand’

#### HAVE-PERFECTS WITH INTRANSITIVES

1. Du **hast geweint**? [I.viii]  
‘You have been crying?’

#### BE-PERFECTS WITH INTRANSITIVES

1. Was gilt’s, der Herr Major **ist** nicht nach Hause **gekommen**, und Er hat hier auf ihn gelauert? [I.ii]  
‘What will you bet the Major has not returned home, and you have been keeping watch for him?’
2. Und ich glaube nicht einmal, daß sie sonstwo **unterkommen wäre**. [I.ii]  
‘Besides, I don’t believe they could have got a lodging elsewhere.’
3. Einem Manne wie meinem Herrn, der Jahr und Tag bei Ihm gewohnt, von dem Er schon so manchen schönen Taler gezogen, der in seinem Leben keinen Heller schuldig **geblieben ist** [I.ii]  
‘a man like my master, who has lodged at your house above a year; from whom you have had already so many shining thalers; who never owed a heller in his life’
4. **Würden** Sie höflicher mit mir **verfahren sein**. [I.iii]  
‘You would have treated me rather more civilly.’
5. Sie **würden** sein letzter Gedanke, Ihr Name der letzte Ton seiner sterbenden Lippen **gewesen sein**, hätte nicht die stärkere Natur dieses traurige Vorrecht für seinen unglücklichen Sohn, für seine unglückliche Gattin gefordert [I.vi]

‘You would have been in his last thoughts, your name would have been the last sound on his dying lips, had not natural affection, stronger than friendship, demanded this sad prerogative for his unfortunate son, and his unhappy wife.’

6. Nein, Marloff **ist** mir nichts schuldig **gebleiben** [sic.] [I.vi]  
‘Marloff does not owe me anything’
7. Ich wüßte mich auch nicht zu erinnern, daß er mir jemals etwas schuldig **gewesen wäre**. [I.vi]  
‘nor can I remember that he ever did owe me anything’

### MODAL HAVE

1. ich **habe** mit meinem Bedienten **zu sprechen** [I.iii]  
‘I wish to speak with my servant.’
2. Geschwind, gnädige Frau, was **haben** Sie **zu befehlen**? [I.vi]  
‘Quick, Madam, what have you to request?’
3. Marloff **hat** noch an der Kasse unsers ehemaligen Regiments **zu fordern**. [I.vi]  
‘Marloff also had claims upon the chest of our old regiment.’
4. dein wildes, ungestümes Wesen gegen alle, von denen du meinst, daß sie dir nichts **zu sagen haben** [I.viii]  
‘your savage boisterous temper towards all who you think have no business to speak to you’

### MODAL BE

1. Sie finden mich in einer Stunde, wo ich leicht **zu verleiten wäre**, wider die Vorsicht zu murren. [I.vi]  
‘You come to me at a time when I might easily be misled to murmur against Providence.’

### SEIN-PASSIVES

### WERDEN-PASSIVES

1. Sie **müssen bezahlt werden** [I.iii]  
‘You must be paid’
2. Das ist Geld, welches mir aufzuheben **gegeben worden**. [I.iv]  
‘That is money given into my charge.’
3. Wenn ich sie nicht habe, so ist es ein Beweis, daß ich nie eine gehabt habe, oder daß sie **getilgt** und von mir schon **zurückgegeben worden**. [I.vi]  
‘If I have not got it, it is a proof that I never had it, or that it has been honoured and already returned by me.’
4. **Werden** meine **bezahlt**, so **müssen** auch die seinigen **bezahlt werden**. [I.vi]

5. 'If my demands are paid, his must be paid also.'

#### AMBIGUITY BETWEEN PASSIVE AND STATIVE

##### SEIN

1. Die Wirtshäuser **sind** jetzt alle stark **besetzt**. [I.ii]  
'The inns are all now quite full.'
2. Das Zimmer **ist** doch sonst galant und **tapeziert**— [I.ii]  
'The room is otherwise very nice, and is papered!!!!'
3. Denn ich **bin** gewiß **versichert**, daß Ihro Gnaden keine Ungnade deswegen auf mich geworfen haben [I.iii]  
'For I feel quite sure that your honour is not displeased with me in this matter'
4. Ich **bin** dir sehr **verbunden**, Just. [I.iv]  
'I am much obliged to you, Just.'
5. so **bin** ich wenigstens **beruhiget** [I.vi]  
'and then at least I shall be at ease'

#### AMBIGUITY BETWEEN BE-PERFECT AND PASSIVE OR STATIVE

##### MISSING AUXILIARY

1. Just (nachdem er **getrunken**). [I.ii]  
'JUST. (after drinking).'
2. Selbst **gemacht**, Herr Wirt? [I.ii]  
'Made at home, Landlord?'
3. Einem Manne wie meinem Herrn, der Jahr und Tag bei Ihm **gewohnt**, von dem Er schon so manchen schönen Taler **gezogen**, der in seinem Leben keinen Heller schuldig **geblieben ist** [I.ii]  
'a man like my master, who has lodged at your house above a year; from whom you have had already so many shining thalers; who never owed a heller in his life'
4. Wirt Die Aussicht war wohl sehr schön, ehe sie der verzweifelte Nachbar verbaute. Das Zimmer **ist** doch sonst galant und tapeziert— [I.ii]  
'LAND.  
The view was uncommonly fine, before the confounded neighbour obstructed it. The room is otherwise very nice, and is papered!!!!'
- Just  
**Gewesen!**  
'JUST.  
Has been!'
5. welches Ihro Gnaden in dem Schreibepulte **stehen gehabt** [I.iii]  
'which your honour had in your writing-desk'

6. Und was ist denn das für ein Beutel mit fünfhundert Taler Louisdor, den der Wirt in Ihrem Schreibpulte **gefunden**? [I.iv]  
 ‘What is that purse then with five hundred thalers’ worth of louis d’ors, which the Landlord found in your desk?’
  
7. Das ist Geld, welches mir aufzuheben gegeben **worden**. [I.iv]  
 ‘That is money given into my charge.’
  
8. Ich reise auf das Land, wo mir eine gutherzige, aber eben auch nicht glückliche Freundin eine Zuflucht vors erste **angeboten**. [I.v]  
 ‘I am going into the country, where a kind, but also unfortunate friend, has for the present offered me an asylum.’
  
9. Wenn ich sie nicht habe, so ist es ein Beweis, daß ich nie eine gehabt habe, oder daß sie getilgt und von mir schon zurückgegeben **worden**. [I.vi]  
 ‘If I have not got it, it is a proof that I never had it, or that it has been honoured and already returned by me.’
  
10. Ich habe nie etwas tun können, mich mit einem Manne abzufinden, der sechs Jahre Glück und Unglück, Ehre und Gefahr mit mir **geteilet**. [I.vi]  
 ‘I have never been able to do anything to repay a man who shared with me good and ill luck, honour and danger, for six years.’
  
11. Seit dem Ersten dieses an Kleinigkeiten **ausgelegt** 1 Taler 7 Gr. 9 Pf. [I.viii]  
 ‘During the first part of this month, laid out in sundries—1 thaler 7 groschen 9 pfennigs.’
  
12. An den Feldscher für mich **bezahlt** 25 Taler [I.viii]  
 ‘Paid for me to the army-surgeon twenty-five thalers’
  
13. Für Wartung und Pflege während meiner Kur für mich **bezahlt** 39 Taler [I.viii]  
 ‘Attendance and nurse during my cure, paid for me, thirty-nine thalers’
  
14. Meinem abgebrannten und geplünderten Vater auf meine Bitte **vorgeschossen**, ohne die zwei Beutepferde zu rechnen, die er ihm **geschenkt**, 50 Taler. [I.viii]  
 ‘Advanced, at my request, to my father—who was burnt out of his house and robbed—without reckoning the two horses of which he made him a present, fifty thalers’
  
15. Davon **abgezogen** vorstehende 22 Taler 7 Gr. 9 Pf., bleibe dem Herrn Major schuldig 91 Taler 16 Gr. 3 Pf. [I.viii]  
 ‘Deduct the above 22 thalers, 7gr. 9pf.; I remain in debt to my master, the Major, 91 thalers, 16gr. 3pf.’
