# Supplementary material
Source: publisher figshare collection journal article supplement (https://brill.figshare.com/articles/dataset/_/9675644)
Supplement: Supplementary file 9 [file 1]

## APPENDIX 1: FREQUENCY OF PERFECTS AND PRETERITES IN ENGLISH

By way of illustrating the rise of the perfect against the backdrop of the much more widespread and ancient preterite, I collected frequency data from Early English Books Online, comprising 755 million words of British English between the 1470s and the 1690s (<https://corpus.byu.edu/eebo/>, accessed on 09 Sept 2018), the Hansard Corpus, comprising 1.6 billion words of speeches from the British Parliament between 1803 and 2005 (<https://www.hansard-corpus.org/>, accessed on 09 Sept 2018), as well as COHA, 400 million words of American English between 1810 and 2009 (<https://corpus.byu.edu/coha/>, accessed on 09 Sept 2018). I searched for preterites and present perfects of two of the commonest lexemes, *be* and *do*, since they possess distinct shapes for the finite preterite and the non-finite past participle. The results are laid out in Tables 1–3, demonstrating how the perfect gradually carved out more and more territory from the consistently dominant preterite, though it has dwindled somewhat in American English over the latter half of the 20<sup>th</sup> and into the 21<sup>st</sup> c. (Tables 3a–e).

Table 1a. Frequency of *has been* in Early English Books Online<sup>1</sup>

| SECTION   | ALL   | 1470s | 1480s | 1490s | 1500s | 1510s | 1520s | 1530s | 1540s | 1550s | 1560s | 1570s | 1580s | 1590s | 1600s | 1610s | 1620s | 1630s | 1640s | 1650s | 1660s | 1670s | 1680s | 1690s  |
|-----------|-------|-------|-------|-------|-------|-------|-------|-------|-------|-------|-------|-------|-------|-------|-------|-------|-------|-------|-------|-------|-------|-------|-------|--------|
| FREQ      | 25624 | 0     | 0     | 0     | 0     | 0     | 0     | 0     | 0     | 0     | 0     | 0     | 0     | 0     | 32    | 12    | 14    | 56    | 236   | 992   | 2073  | 3664  | 7378  | 11167  |
| WORDS (M) | 755   | 0.7   | 3.7   | 2.0   | 1.3   | 0.9   | 3.0   | 7.1   | 8.7   | 7.2   | 16.1  | 26.9  | 32.0  | 24.1  | 40.0  | 42.9  | 38.6  | 42.8  | 47.1  | 99.5  | 63.5  | 74.6  | 92.6  | 79.7   |
| PER MIL   | 33.94 | 0.00  | 0.00  | 0.00  | 0.00  | 0.00  | 0.00  | 0.00  | 0.00  | 0.00  | 0.00  | 0.00  | 0.00  | 0.00  | 0.80  | 0.28  | 0.36  | 1.31  | 5.01  | 9.97  | 32.65 | 49.11 | 79.69 | 140.08 |
|           |       |       |       |       |       |       |       |       |       |       |       |       |       |       |       |       |       |       |       |       |       |       |       |        |

<sup>1</sup> The first row lists all the sections of the corpus by decade. The second row gives the number of occurrences of the form in the relevant section, while the third row states how many words (in millions) that part of the corpus contains. The fourth row gives the frequencies per one million words, with the bars visualising those frequencies.

Table 1b. Frequency of *was* in Early English Books Online

| SECTION   | AL       | 1470s    | 1480s     | 1490s    | 1500s    | 1510s     | 1520s    | 1530s    | 1540s    | 1550s    | 1560s    | 1570s    | 1580s    | 1590s    | 1600s    | 1610s    | 1620s    | 1630s    | 1640s    | 1650s    | 1660s    | 1670s    | 1680s    | 1690s    |
|-----------|----------|----------|-----------|----------|----------|-----------|----------|----------|----------|----------|----------|----------|----------|----------|----------|----------|----------|----------|----------|----------|----------|----------|----------|----------|
| FREQ      | 4077464  | 6157     | 39183     | 14471    | 9841     | 11054     | 25870    | 35327    | 52453    | 40727    | 81467    | 136153   | 167801   | 117537   | 216032   | 210999   | 193671   | 190967   | 234849   | 517709   | 305370   | 420853   | 558404   | 490569   |
| WORDS (M) | 755      | 0.7      | 3.7       | 2.0      | 1.3      | 0.9       | 3.0      | 7.1      | 8.7      | 7.2      | 16.1     | 26.9     | 32.0     | 24.1     | 40.0     | 42.9     | 38.6     | 42.8     | 47.1     | 99.5     | 63.5     | 74.6     | 92.6     | 79.7     |
| PER MIL   | 5,400.61 | 8,645.89 | 10,570.18 | 7,262.72 | 7,639.99 | 11,683.54 | 8,501.66 | 4,975.64 | 6,022.38 | 5,641.31 | 5,064.81 | 5,056.33 | 5,251.13 | 4,875.96 | 5,396.59 | 4,918.22 | 5,028.77 | 4,459.14 | 4,983.11 | 5,205.57 | 4,809.60 | 5,641.40 | 6,031.33 | 6,153.67 |
|           |          |          |           |          |          |           |          |          |          |          |          |          |          |          |          |          |          |          |          |          |          |          |          |          |

Table 1c. Frequency of *has done* in Early English Books Online

| SECTION   | AL   | 1470s | 1480s | 1490s | 1500s | 1510s | 1520s | 1530s | 1540s | 1550s | 1560s | 1570s | 1580s | 1590s | 1600s | 1610s | 1620s | 1630s | 1640s | 1650s | 1660s | 1670s | 1680s | 1690s |
|-----------|------|-------|-------|-------|-------|-------|-------|-------|-------|-------|-------|-------|-------|-------|-------|-------|-------|-------|-------|-------|-------|-------|-------|-------|
| FREQ      | 4102 | 0     | 1     | 0     | 3     | 0     | 1     | 0     | 1     | 6     | 0     | 0     | 0     | 1     | 26    | 30    | 30    | 58    | 92    | 212   | 349   | 740   | 1067  | 1485  |
| WORDS (M) | 755  | 0.7   | 3.7   | 2.0   | 1.3   | 0.9   | 3.0   | 7.1   | 8.7   | 7.2   | 16.1  | 26.9  | 32.0  | 24.1  | 40.0  | 42.9  | 38.6  | 42.8  | 47.1  | 99.5  | 63.5  | 74.6  | 92.6  | 79.7  |
| PER MIL   | 5.43 | 0.00  | 0.27  | 0.00  | 2.33  | 0.00  | 0.33  | 0.00  | 0.11  | 0.83  | 0.00  | 0.00  | 0.00  | 0.04  | 0.65  | 0.70  | 0.78  | 1.35  | 1.95  | 2.13  | 5.50  | 9.92  | 11.52 | 18.63 |
|           |      |       |       |       |       |       |       |       |       |       |       |       |       |       |       |       |       |       |       |       |       |       |       |       |

Table 1d. Frequency of *have done* in Early English Books Online

| SECTION   | ALL   | 1470s | 1480s | 1490s | 1500s | 1510s | 1520s | 1530s | 1540s | 1550s | 1560s | 1570s | 1580s | 1590s | 1600s | 1610s | 1620s | 1630s | 1640s  | 1650s | 1660s  | 1670s  | 1680s | 1690s  |
|-----------|-------|-------|-------|-------|-------|-------|-------|-------|-------|-------|-------|-------|-------|-------|-------|-------|-------|-------|--------|-------|--------|--------|-------|--------|
| FREQ      | 49408 | 0     | 0     | 1     | 0     | 0     | 27    | 28    | 0     | 7     | 4     | 0     | 37    | 35    | 229   | 101   | 426   | 2563  | 5336   | 9575  | 6501   | 7630   | 8751  | 8157   |
| WORDS (M) | 755   | 0.7   | 3.7   | 2.0   | 1.3   | 0.9   | 3.0   | 7.1   | 8.7   | 7.2   | 16.1  | 26.9  | 32.0  | 24.1  | 40.0  | 42.9  | 38.6  | 42.8  | 47.1   | 99.5  | 63.5   | 74.6   | 92.6  | 79.7   |
| PER MIL   | 65.44 | 0.00  | 0.00  | 0.50  | 0.00  | 0.00  | 8.87  | 3.94  | 0.00  | 0.97  | 0.25  | 0.00  | 1.16  | 1.45  | 5.72  | 2.35  | 11.05 | 59.85 | 113.22 | 96.28 | 102.39 | 102.28 | 94.52 | 102.32 |
|           |       |       |       |       |       |       |       |       |       |       |       |       |       |       |       |       |       |       |        |       |        |        |       |        |

Table 1e. Frequency of *did* in Early English Books Online

| SECTION   | ALL     | 1470s  | 1480s  | 1490s | 1500s | 1510s | 1520s | 1530s  | 1540s  | 1550s   | 1560s   | 1570s   | 1580s   | 1590s   | 1600s   | 1610s   | 1620s   | 1630s   | 1640s   | 1650s   | 1660s   | 1670s   | 1680s   | 1690s   |
|-----------|---------|--------|--------|-------|-------|-------|-------|--------|--------|---------|---------|---------|---------|---------|---------|---------|---------|---------|---------|---------|---------|---------|---------|---------|
| FREQ      | 1048661 | 102    | 670    | 59    | 46    | 26    | 290   | 896    | 4814   | 7341    | 21130   | 35853   | 50241   | 47567   | 60767   | 69716   | 57983   | 59230   | 71260   | 145948  | 85440   | 103741  | 125147  | 100394  |
| WORDS (M) | 755     | 0.7    | 3.7    | 2.0   | 1.3   | 0.9   | 3.0   | 7.1    | 8.7    | 7.2     | 16.1    | 26.9    | 32.0    | 24.1    | 40.0    | 42.9    | 38.6    | 42.8    | 47.1    | 99.5    | 63.5    | 74.6    | 92.6    | 79.7    |
| PER MIL   | 138.95  | 14.323 | 180.74 | 29.61 | 35.71 | 27.48 | 95.30 | 126.20 | 552.72 | 1016.84 | 1313.65 | 1331.48 | 1572.23 | 1973.29 | 1517.99 | 1625.02 | 1504.06 | 1383.04 | 1512.02 | 1467.51 | 1345.69 | 1390.62 | 1351.71 | 1259.34 |
|           |         |        |        |       |       |       |       |        |        |         |         |         |         |         |         |         |         |         |         |         |         |         |         |         |

Table 2a. Frequency of *has been* in the Hansard Corpus

| SECTION | 1800 | 1810 | 1820 | 1830 | 1840  | 1850  | 1860  | 1870  | 1880  | 1890  | 1900  | 1910   | 1920   | 1930   | 1940   | 1950   | 1960   | 1970   | 1980   | 1990   | 2000   |
|---------|------|------|------|------|-------|-------|-------|-------|-------|-------|-------|--------|--------|--------|--------|--------|--------|--------|--------|--------|--------|
| FREQ    | 2262 | 2143 | 3474 | 7342 | 14253 | 18028 | 23113 | 24697 | 58015 | 72186 | 79018 | 134259 | 120667 | 159828 | 145196 | 179899 | 213857 | 220430 | 245680 | 217519 | 101742 |
| PER MIL | .454 | .300 | .299 | .261 | .469  | .546  | .675  | .665  | .966  | 1.410 | 1.228 | 1.682  | 1.683  | 1.679  | 1.530  | 1.487  | 1.406  | 1.349  | 1.337  | 1.228  | 1.150  |
|         |      |      |      |      |       |       |       |       |       |       |       |        |        |        |        |        |        |        |        |        |        |

Table 2b. Frequency of *was* in the Hansard Corpus

| SECTION | 1800   | 1810   | 1820   | 1830   | 1840   | 1850   | 1860   | 1870   | 1880   | 1890   | 1900   | 1910   | 1920   | 1930   | 1940   | 1950   | 1960   | 1970   | 1980   | 1990   | 2000   |
|---------|--------|--------|--------|--------|--------|--------|--------|--------|--------|--------|--------|--------|--------|--------|--------|--------|--------|--------|--------|--------|--------|
| FREQ    | 73147  | 120676 | 201934 | 472145 | 463060 | 488588 | 489309 | 560379 | 794264 | 501704 | 732801 | 410536 | 368701 | 452002 | 459995 | 615017 | 727703 | 733813 | 782258 | 744168 | 348285 |
| PER MIL | 14.702 | 16.914 | 17.387 | 16.822 | 15.245 | 14.809 | 14.299 | 15.104 | 13.232 | 9.806  | 11.330 | 5.143  | 5.142  | 4.748  | 4.849  | 5.084  | 4.786  | 4.492  | 4.257  | 4.201  | 3.937  |
|         |        |        |        |        |        |        |        |        |        |        |        |        |        |        |        |        |        |        |        |        |        |

Table 2c. Frequency of *has done* in the Hansard Corpus

| SECTION | 1800  | 1810 | 1820 | 1830 | 1840  | 1850  | 1860  | 1870  | 1880  | 1890  | 1900  | 1910  | 1920  | 1930  | 1940  | 1950  | 1960  | 1970  | 1980  | 1990  | 2000  |
|---------|-------|------|------|------|-------|-------|-------|-------|-------|-------|-------|-------|-------|-------|-------|-------|-------|-------|-------|-------|-------|
| FREQ    | 62    | 57   | 77   | 183  | 369   | 533   | 663   | 612   | 1323  | 1724  | 1833  | 4398  | 3725  | 4972  | 5299  | 7889  | 9611  | 9485  | 10548 | 9597  | 4679  |
| PER MIL | 12.46 | 7.99 | 6.63 | 6.52 | 12.15 | 16.16 | 19.38 | 16.50 | 22.04 | 33.70 | 28.34 | 55.10 | 51.96 | 52.23 | 55.87 | 65.22 | 63.21 | 58.07 | 57.41 | 54.18 | 52.90 |
|         |       |      |      |      |       |       |       |       |       |       |       |       |       |       |       |       |       |       |       |       |       |

Table 2d. Frequency of *have done* in the Hansard Corpus

| SECTION | 1800                                                                               | 1810  | 1820  | 1830  | 1840  | 1850  | 1860  | 1870  | 1880  | 1890  | 1900  | 1910   | 1920   | 1930   | 1940   | 1950   | 1960   | 1970   | 1980   | 1990   | 2000   |
|---------|------------------------------------------------------------------------------------|-------|-------|-------|-------|-------|-------|-------|-------|-------|-------|--------|--------|--------|--------|--------|--------|--------|--------|--------|--------|
| FREQ    | 334                                                                                | 325   | 601   | 1340  | 1854  | 1981  | 2293  | 2345  | 4007  | 4139  | 4733  | 10052  | 8265   | 11107  | 12452  | 15883  | 18982  | 18621  | 19456  | 17748  | 9200   |
| PER MIL | 67.13                                                                              | 45.55 | 51.75 | 47.74 | 61.04 | 60.04 | 67.01 | 63.21 | 66.76 | 80.90 | 73.18 | 125.93 | 115.29 | 116.68 | 131.29 | 131.30 | 124.85 | 114.00 | 105.89 | 100.20 | 104.01 |
|         | 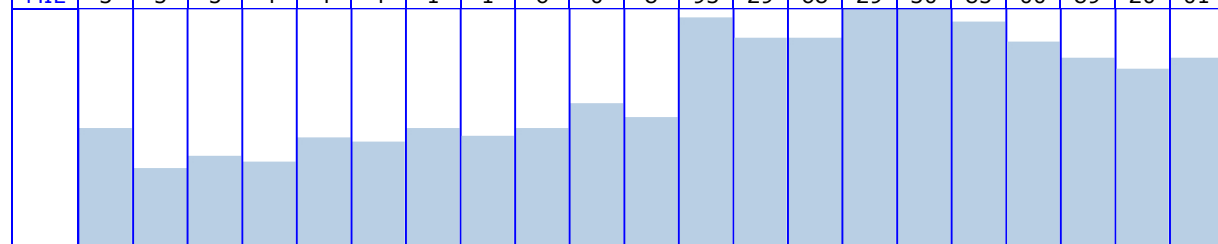 |       |       |       |       |       |       |       |       |       |       |        |        |        |        |        |        |        |        |        |        |

Table 2e. Frequency of *did* in the Hansard corpus

| SECTION | 1800                                                                                | 1810     | 1820     | 1830     | 1840     | 1850     | 1860     | 1870     | 1880     | 1890     | 1900     | 1910   | 1920   | 1930   | 1940   | 1950   | 1960   | 1970   | 1980   | 1990   | 2000   |
|---------|-------------------------------------------------------------------------------------|----------|----------|----------|----------|----------|----------|----------|----------|----------|----------|--------|--------|--------|--------|--------|--------|--------|--------|--------|--------|
| FREQ    | 8569                                                                                | 13559    | 27458    | 62316    | 62166    | 57843    | 56044    | 69097    | 104351   | 66064    | 95573    | 53825  | 46486  | 56463  | 63553  | 87207  | 104749 | 107343 | 118941 | 117923 | 56938  |
| PER MIL | 1.722.31                                                                            | 1.900.50 | 2.364.28 | 2.220.34 | 2.046.71 | 1.753.23 | 1.637.84 | 1.862.42 | 1.738.50 | 1.291.32 | 1.477.80 | 674.34 | 648.42 | 593.16 | 670.06 | 720.93 | 688.95 | 657.17 | 647.36 | 665.76 | 643.73 |
|         | 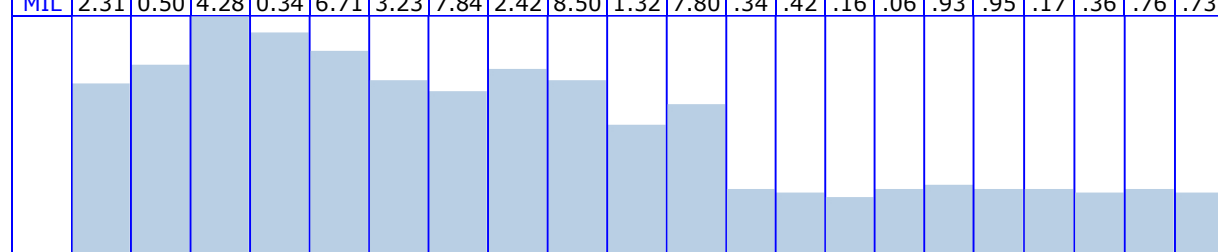 |          |          |          |          |          |          |          |          |          |          |        |        |        |        |        |        |        |        |        |        |

Table 3a. Frequency of *has been* in COHA

| SECTION   | AL L                                                                                 | 1810   | 1820   | 1830   | 1840   | 1850   | 1860   | 1870   | 1880   | 1890   | 1900   | 1910   | 1920   | 1930   | 1940   | 1950   | 1960   | 1970   | 1980   | 1990   | 2000   |
|-----------|--------------------------------------------------------------------------------------|--------|--------|--------|--------|--------|--------|--------|--------|--------|--------|--------|--------|--------|--------|--------|--------|--------|--------|--------|--------|
| FREQ      | 174641                                                                               | 630    | 3304   | 6324   | 6811   | 6973   | 7076   | 7643   | 9700   | 9748   | 11148  | 11170  | 13758  | 12501  | 10863  | 10327  | 10467  | 9995   | 9546   | 8702   | 7955   |
| WORDS (M) | 405                                                                                  | 1.2    | 6.9    | 13.8   | 16.0   | 16.5   | 17.1   | 18.6   | 20.3   | 20.6   | 22.1   | 22.7   | 25.7   | 24.6   | 24.3   | 24.5   | 24.0   | 23.8   | 25.3   | 27.9   | 29.6   |
| PER MIL   | 431.21                                                                               | 533.35 | 476.96 | 459.11 | 424.40 | 423.33 | 414.90 | 411.75 | 477.46 | 473.18 | 504.49 | 492.06 | 536.30 | 508.12 | 446.16 | 420.74 | 436.54 | 419.69 | 377.07 | 311.44 | 269.05 |
|           | 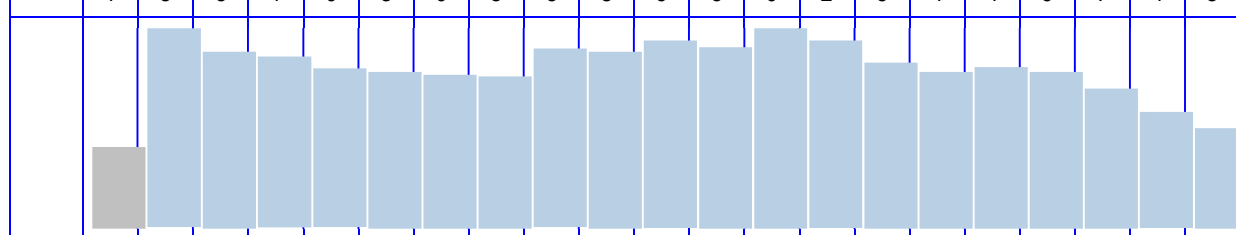 |        |        |        |        |        |        |        |        |        |        |        |        |        |        |        |        |        |        |        |        |

Table 3b. Frequency of *was* in COHA

| SECTION   | AL L        | 18 10      | 18 20      | 18 30      | 18 40      | 18 50      | 18 60      | 187 0       | 188 0       | 189 0       | 190 0       | 191 0       | 192 0       | 193 0       | 194 0       | 195 0       | 19 60      | 19 70      | 198 0       | 19 90      | 20 00      |
|-----------|-------------|------------|------------|------------|------------|------------|------------|-------------|-------------|-------------|-------------|-------------|-------------|-------------|-------------|-------------|------------|------------|-------------|------------|------------|
| FREQ      | 406 193 1   | 46 71      | 64 51 9    | 11 62 19   | 13 92 94   | 15 54 79   | 16 55 57   | 195 637     | 210 542     | 223 403     | 236 422     | 236 639     | 262 470     | 263 644     | 265 950     | 254 762     | 23 71 43   | 23 64 33   | 254 527     | 25 46 71   | 28 39 49   |
| WORDS (M) | 405         | 1.2        | 6.9        | 13.8       | 16.0       | 16.5       | 17.1       | 18.6        | 20.3        | 20.6        | 22.1        | 22.7        | 25.7        | 24.6        | 24.3        | 24.5        | 24.0       | 23.8       | 25.3        | 27.9       | 29.6       |
| PER MIL   | 10, 029 .46 | 3,9 54. 44 | 9,3 13. 90 | 8,4 37. 20 | 8,6 79. 62 | 9,4 39. 19 | 9,7 07. 31 | 10, 539 .50 | 10, 363 .38 | 10, 844 .36 | 10, 698 .99 | 10, 424 .33 | 10, 231 .25 | 10, 716 .10 | 10, 922 .89 | 10, 379 .46 | 9,8 90. 34 | 9,9 27. 82 | 10, 054 .01 | 9,1 14. 42 | 9,6 03. 45 |
|           |             |            |            |            |            |            |            |             |             |             |             |             |             |             |             |             |            |            |             |            |            |

Table 3c. Frequency of *has* done in COHA

| SECTION   | AL L   | 18 10  | 18 20  | 18 30  | 18 40  | 18 50  | 18 60  | 18 70  | 18 80  | 18 90  | 19 00  | 19 10  | 19 20  | 19 30  | 19 40  | 19 50  | 19 60  | 19 70  | 19 80  | 19 90  | 20 00  |
|-----------|--------|--------|--------|--------|--------|--------|--------|--------|--------|--------|--------|--------|--------|--------|--------|--------|--------|--------|--------|--------|--------|
| FREQ      | 79 87  | 20     | 17 7   | 32 6   | 36 5   | 39 5   | 43 3   | 45 0   | 46 3   | 55 4   | 56 5   | 52 5   | 61 2   | 41 0   | 40 3   | 40 0   | 36 9   | 38 1   | 40 0   | 38 2   | 35 7   |
| WORDS (M) | 40 5   | 1.2    | 6.9    | 13.8   | 16.0   | 16.5   | 17.1   | 18.6   | 20.3   | 20.6   | 22.1   | 22.7   | 25.7   | 24.6   | 24.3   | 24.5   | 24.0   | 23.8   | 25.3   | 27.9   | 29.6   |
| PER MIL   | 19. 72 | 16. 93 | 25. 55 | 23. 67 | 22. 74 | 23. 98 | 25. 39 | 24. 24 | 22. 79 | 26. 89 | 25. 57 | 23. 13 | 23. 86 | 16. 66 | 16. 55 | 16. 30 | 15. 39 | 16. 00 | 15. 80 | 13. 67 | 12. 07 |
|           |        |        |        |        |        |        |        |        |        |        |        |        |        |        |        |        |        |        |        |        |        |

Table 3d. Frequency of *have done* in COHA

| SECTION   | AL L    | 18 10  | 18 20  | 18 30  | 18 40  | 18 50  | 18 60  | 18 70  | 18 80  | 18 90  | 19 00  | 19 10  | 19 20  | 19 30  | 19 40  | 19 50  | 19 60  | 19 70  | 19 80  | 19 90  | 20 00  |
|-----------|---------|--------|--------|--------|--------|--------|--------|--------|--------|--------|--------|--------|--------|--------|--------|--------|--------|--------|--------|--------|--------|
| FREQ      | 22 61 9 | 63     | 67 6   | 10 59  | 11 26  | 13 50  | 13 14  | 15 12  | 15 64  | 14 95  | 13 94  | 15 43  | 14 25  | 11 48  | 10 49  | 10 54  | 95 4   | 97 0   | 10 01  | 94 2   | 98 0   |
| WORDS (M) | 40 5    | 1.2    | 6.9    | 13. 8  | 16. 0  | 16. 5  | 17. 1  | 18. 6  | 20. 3  | 20. 6  | 22. 1  | 22. 7  | 25. 7  | 24. 6  | 24. 3  | 24. 5  | 24. 0  | 23. 8  | 25. 3  | 27. 9  | 29. 6  |
| PER MIL   | 55. 85  | 53. 34 | 97. 59 | 76. 88 | 70. 16 | 81. 96 | 77. 05 | 81. 46 | 76. 98 | 72. 57 | 63. 08 | 67. 97 | 55. 55 | 46. 66 | 43. 08 | 42. 94 | 39. 79 | 40. 73 | 39. 54 | 33. 71 | 33. 14 |
|           |         |        |        |        |        |        |        |        |        |        |        |        |        |        |        |        |        |        |        |        |        |

Table 3e. Frequency of *did* in COHA

| SECTION   | AL L       | 18 10    | 18 20    | 18 30    | 18 40    | 18 50      | 18 60      | 18 70      | 18 80      | 18 90      | 19 00      | 19 10      | 19 20      | 19 30      | 19 40      | 19 50      | 19 60      | 19 70      | 19 80      | 19 90      | 20 00      |
|-----------|------------|----------|----------|----------|----------|------------|------------|------------|------------|------------|------------|------------|------------|------------|------------|------------|------------|------------|------------|------------|------------|
| FREQ      | 66 29 94   | 94 0     | 64 90    | 12 69 0  | 15 73 4  | 19 92 1    | 22 92 0    | 27 74 8    | 30 69 3    | 29 41 8    | 34 38 9    | 38 32 2    | 40 98 9    | 43 26 4    | 44 68 8    | 44 24 1    | 45 14 7    | 45 17 4    | 46 51 7    | 55 30 9    | 58 40 0    |
| WORDS (M) | 40 5       | 1.2      | 6.9      | 13. 8    | 16. 0    | 16. 5      | 17. 1      | 18. 6      | 20. 3      | 20. 6      | 22. 1      | 22. 7      | 25. 7      | 24. 6      | 24. 3      | 24. 5      | 24. 0      | 23. 8      | 25. 3      | 27. 9      | 29. 6      |
| PER MIL   | 1,6 37. 02 | 79 5.8 0 | 93 6.8 9 | 92 1.2 6 | 98 0.4 1 | 1,2 09. 41 | 1,3 43. 90 | 1,4 94. 86 | 1,5 10. 78 | 1,4 28. 00 | 1,5 56. 23 | 1,6 88. 15 | 1,5 97. 78 | 1,7 58. 51 | 1,8 35. 39 | 1,8 02. 46 | 1,8 82. 91 | 1,8 96. 86 | 1,8 37. 46 | 1,9 79. 45 | 1,9 75. 15 |
|           |            |          |          |          |          |            |            |            |            |            |            |            |            |            |            |            |            |            |            |            |            |
