# Supplementary material
Source: publisher figshare collection journal article supplement (https://brill.figshare.com/articles/dataset/_/9675644)
Supplement: Supplementary file 10 [file 1]

## APPENDIX 10: THE TALE OF TROY (FOURTEENTH-CENTURY BULGARIAN)

Bulgarian: *Троянска притча/Trojanska pritča*

Source: [http://histdict.uni-sofia.bg/textcorpus/show/doc\\_165](http://histdict.uni-sofia.bg/textcorpus/show/doc_165) (accessed on 06 March 2017)

Word count: approx. 6,876 words (based on [http://histdict.uni-sofia.bg/textcorpus/show/doc\\_165](http://histdict.uni-sofia.bg/textcorpus/show/doc_165), accessed on 06 March 2017)

### BE-PERFECTS

(29 present perfects + 9 pluperfects)

1. що бѣ зидалъ своимъ именемъ  
‘what he had built in his name’
2. И обрѣте его въчаръ старъ, емоу же бѣ жена родила с(ы)на  
‘And an old shepherd found him, whose wife had given birth to a son.’
3. тамо сѧ є обрѣло и тамо да сѧ и расждитъ  
‘that’s where it was found and that’s where it is to be judged’
4. както ж си и прѣвое чюлъ  
‘as you have initially heard (about her?)’
5. контю моу сѧ ѡт(є)цъ бѣ нареклъ  
‘who had called himself his father’
6. єже на си реклъ  
‘which you have told us’
7. Мѡі єсѡѣ створила Троѡ градъ  
‘The two of us have built the city of Troy’
8. како си бесѣдовала сѣ Ипитеромъ прор(о)комъ  
‘[don’t boast] that you have spoken to Jupiter the prophet’
9. како ми єс(т’) б(ог)ъ пособиѧ  
‘as god has helped me’
10. Азъ нѣсмъ пришелъ да слоужж на златъ или висрѣ  
‘I am/have not come to serve for the sake of gold or gems’
11. Оубиле с[жтъ] витези обрѣтше кошоутъ вильі пророчицъ Фелешъ
12. г(оспо)ждъ, и прогнвала сѧ є на нихъ, и поустила є вълъны на морє, да
13. погоуентъ всѧ грѣцьскыѡ корабѧ  
‘The knights have killed the doe they found which belonged to the prophetess P., and she got angry at them and has released the waves on the sea in order to destroy all Greek ships’
14. понеже си пошелъ сѣ братомъ своимъ  
‘since you have set off with your brother’
15. И кон сѧ сѧ двигнѧ грѣцькыѡ воеводы, и [...] витези, да снє сєѡѣ сжтъ

16. НАИШЛО СЪМРЪТЪ, А ТЕБѢ СРАМОТЪ, И НАИШЛО СЯ Е МНОГО Г(ОСПО)ЖДЪ ВЪ
17. ВДОВИЧЕСТВО, АЩЕ ТОЛИКО НЕ ПОУСТИШЬ ЗА СВОЖ ДЪЩЕРЪ  
 ‘And those Greek leaders that have set off and [...] the knights, they will meet their deaths, and bring you shame, and many a lady will become a widow, if you don’t give up your daughter’
18. ТОГЫ ВЪЗА ЕЛЕНЪ Ц(А)Р(И)ЦЪ, А МЕНЕ ЕСИ ОСТАВИЛЪ  
 ‘Then you took Queen Helen, and have [now] left me’
19. А КОГЫ БИХЪ ВИДѢЛА, ПОЖА СИ ЕЛЕНЪ Ц(А)Р(И)ЦЪ И ИДЕШЬ, ТО ПАКЫ УМОЛИЛА БИХЪ  
ВИЛЪ, ТА БИХЪ ТВОИ КОРАБЛЕ ПОТОНЪЛЕ  
 ‘And if I had seen that you had drugged Queen Helen and were coming, I would again have asked the sorceress to sink your ships’
20. И ПО ТОМ ТА Е ВЪЗАЛЪ МЕНЕЛАУШЪ Ц(А)РЪ, А СЕЗИ СИ ВЪ ТРЕТИЯ ПОСТЕЛА
21. ПРѢЛЮБЫ СЪТВОРИЛА, А МЕНЕ ИЗГНАЛА
22. ‘and afterwards King Menelaus took you, and now you have been committing adultery in a third bed, and have driven me away’
23. ТАКО СЪТЪ ПРОР(О)Ч(И)ЦА ПРОРЕКАЛЪ  
 ‘thus have the prophetesses foretold’
24. И БѢХЪ ПЛѢНИЛЕ ГРЪЧЪСТІН ВИТЕЗИ ТРОНСКЫХЪ СТРАНЫ И ПРИВЕЛЕ БѢШЪ
25. РИЖЕОУША ПОПА ДЪЩЕРЕ  
 ‘And the Greek knights had captured the Trojan land and had taken R. the priest’s daughter’
26. ЗАНЕ Е АГАМЕМЪ Ц(А)РЪ РИЖЕОУША ПОПА ДЪЩЕРЕ ВЪЗАЛЪ  
 ‘Because King Agamemnon has taken the daughter of the priest R.’
27. И РЕКАЛЪ Е ТЕБОУХЪ БОГЪ  
 ‘And God T. (has) said...’
28. ПОУСТИЛА МА СТА ОБА Ц(А)РѢ, ДА МА ПРИМЕШЬ НА ОПАТ  
 ‘The two kings have released/sent me, so that you take me back’
29. ПРАВО РЕКАЛЪ ЕСИ  
 ‘You have spoken right’
30. КОИ БѢШЕ СЪ НИМЪ ЕДИНО МАѢКО [СЪ]САЛЪ  
 ‘who had sucked the same milk as him’
31. ДОПУСТИ МИ ОНАКВОЗИ ОРЪЖИЕ, КАКВОТО МИ БѢ И ПРѢЖДЕ ДАЛА.  
 ‘Give me that weapon which you had given me before.’
32. Г(ОСПО)Д(И)НЕ, ЕВО СМЪ АЗЪ САМА, И НѢСМЪ ПРЪВОЕ ПРИХОДИЛА, НИ ГОВОРИЛА
33. ‘It is just me, my lord, and I haven’t earlier come or spoken...’
34. КОЕГО Е ДНЕСЪ Б(ОГ)Ъ ПОЧЪЛЪ  
 ‘Who has god honoured today?’

35. ѡт млада того нѣсмъ сѣтворилъ  
'I haven't done this since I was young'
36. И тоу сѧ бѣ скрѣлъ Елѣноушъ Прѣамоушевъ с(ѣ)нъ  
'And E., Priam's son, had hidden there'
37. Ѹрекшишъ сѧ бѣ створилъ бѣсенъ  
'U. had pretended to be mad'
38. гдѣ того смъ и взалъ  
'where I took him from'

#### CONDITIONALS (BE + -L PARTICIPLE)

1. кож би могла сваджъ вѣнести тамо за онози нѣзване  
'what discord she could incite there because she hadn't been invited'
2. како би Троя не стоалъ до врѣмене, нж да сѧ бѣ разорилъ въ Прѣамошево
3. врѣма  
[they were plotting] how Troy wouldn't survive for a time [for very long?], but it should be ruined in the time of Priam'
4. И егѣ би видѣла тронскѣа витезѣи, не би рекла витези сжтъ, нж
5. г(оспо)д(и)ни и властеле  
'And if you saw the Trojan knights, you wouldn't say they were knights, but lords and masters'
6. Волиа бихъ тицат(и) сѣ вѣснѣмъ псомъ по свѣтоу  
'I would like to run with rabid dogs around the world...'
7. аще не би ихъ Прѣамушъ застѣпилъ  
'if Priam hadn't interceded for them'
8. Ѧ когѣ би видѣла, пожа си Еленѣ ц(а)р(и)цѣ и идешъ, то пакѣи Ѹмолила
9. бихъ вилажъ, та бихъ твои корабли потонжле
10. 'And if I had seen that you had drugged Queen Helen and were coming, I would again have asked the sorceress to sink your ships'
11. да би сѧ оставилъ грѣцкѣи вонскѣи  
'so that you would help the Greek army'
12. давно би ѡделѣ[лъ] Нектору кралоу  
'hopefully you would overpower King Hector'
13. аще не би братъ твои, Екторъ кралъ, вѣзвранилъ грѣчскѣими витезомъ  
'if your brother, King Hector, hadn't stopped the Greek knights'
14. давно сѧ би вѣзвратилъ Екторъ кралъ ѡт нас  
'hopefully King Hector would turn back from us'

15. и възбранѣахъ емоу, да не би исход(и)лъ на брань  
'and they were trying to stop him from going to war [lit. and were stopping him that he wouldn't go to war]'
16. давно са би възвратиъ  
'so that he would return'
17. да би сѣма вставиъ в' Трон  
'if you would leave your seed in Troy'
18. да имъ не би просиъ Ацилеша  
'so he wouldn't ask for Achilles'
19. давно са би сѣма оуохранило въ Трож  
'in the hope that the Trojan seed would be preserved'
20. Аще би сѣи фарижъ былъ въ Трон, помного моу би лѣпоты прибѣло
21. 'If this horse were in Troy, it would be even more beautiful'

#### BE-PASSIVES/STATIVES

1. и та полата бѣше опата роухомъ свиланѣмъ, и златомъ  
'and that palace had been decorated with silk cloths and gold...'
2. коа им бѣ смръть общаа въ Алѣксандра влжчена  
'what shared death Alexander had for them'
3. и прѣложи на немъ свѣтлоє вржжѣ и щитъ, на коєм бѣ писано образъ пространного свѣта, сл(ъ)нце и м(ѣ)с(а)цъ, и звѣзды, и боурѣ  
'and gave him shining armour and a shield on which was painted an image of the wide world, a sun and a moon, and stars, and tempests...'
4. И въ кон д(ь)нь принесено быс(т') вржжѣ то  
'And on the day when the weapon had been provided...'
5. зане бѣ всеъ арматосанъ  
'as he was all armoured'

#### Aorists

поне, доне, обрѣте, видѣ, нача, съзизда, нарече, остарѣ, роди, поржчи, почи, сътвори, приизда, съзизда, именова, рѣди, поржчи, почи, именова, остарѣ, роди, заповѣда, почи, сътвори, приизда, рѣди, реч(е), почи, сътвори, приизда, нареч(е), роди, реч(е), почи, сътвори, приизда, нарече, роди, видѣ, оужасе, вѣста, проіави, реч(е), Родихъ, възиде, паде, излетѣшж, падошж, погорѣ, призва, рекошж, иде, реч(е), реч(е), роди, видѣ, съмили, може, пови, рече, створи, обрѣте, несе, реч(е), быс(т'), сътвори, нареч(е), прободе, призва, дондошж, зва, искова, написа, даде, рече, обрѣтошж, прочѣтошж, раскарашж, сташж, въпросишж, рекошж, рече, възвратишж, дондошж, рекошж,

обрѣтохмы, прочѣтохмы, реч(є), пондошж, продошж, начатъ, реч(є), реч(є), присѣди,  
 възвесили, чю, исправи, понде, възл, понде, приближи, вбрѣте, реч(є), втвѣща, реч(є),  
 постави, възл, понде, изыдошж, прижста, въведоста, Призва, рече, слышаста, придоста,  
 рекоста, начаста, бѣ, съврѣшаста, придоста, рекоста, показа, реч(є), вбѣщахъ,  
 видѣста, прѣвари, разгнѣваста, рекоста, пондоста, начашж, приближи, реч(є), принде,  
 начал, може, поустити, направи, вниде, втринж, отиде, приста, изыде, цѣлова, реч(є),  
 придохъ, обвесели, пожитъ, въведе, поустити, реч(є), озлови, реч(є), поустити, озлови,  
 реч(є), призва, реч(є), реч(є), реч(є), приде, втврѣже, реч(є), үвѣдѣ, створи,  
 леже(?), реч(є), рече, отиде, поведе, реч(є), примькошж, двигнжшж, възатъ, влѣзь(?),  
 втринж, доплотъ, приста, изыде, жтъ, въведошж, възл, втринж, отиде, озлови,  
 възврати, приде, жаловаста, двигнж, приде, принде, оүвѣдѣ, створи, начал, реч(є),  
 поуститаста, оүхыити, поврѣже, състави, поведе, реч(є), вѣдѣ, понде, исчѣтоста,  
 втронжшж, пондошж, присташж, үбишж, үвѣдѣ, разгнѣва, поустити, присташж, озлови,  
 призва, въпроси, быс(т'), реч(є), погоүбишж, слыша, сказа, озлови, бѣ, пристѣпи,  
 реч(є), встави, поустити, втпоуститаста, направи, приста, донде, реч(є), реч(є), реч(є),  
 үмиришж, съединишж, повратишж, обвесели, направи, поведе, прѣсташж, принде,  
 реч(є), быс(т'), опоншж, оүспнишж, оставишж, втринжшж, изыде, зашити, изыдошж,  
 изыде, начал, оүрва, бѣ, смѣ, изл, изыдошж, поставишж, сташж, по[и]де, начаста,  
 оүвѣдѣ, донде, оүвѣдѣ, донде, начал, реч(є), течахъ(?), реч, възл, молѣхъ(?), остави,  
 понде, реч(є), сѣдѣхомъ(?), донде, възл, изыдошж, дондоста, казаста, призваста,  
 начаста, реч(є), заложити, створи, заврѣже, влѣзе, възл, донде, бѣ, оүбис(т'), изведе,  
 донде, възвеселишж, поуститишж, иска, може, донде, бѣ, възврати, исповѣда, искахъ,  
 могохъ, влобиста, поуститаста, направи, поведе, прѣложи, втринж, понде, приста, бѣ,  
 оүвѣдѣ, изыде, бѣ, въведе, реч(є), поустошж, дашж, повелѣ, начашж, минж, реч(є),  
 положи, реч(є), прѣвари, поведе, дондоста, бѣшж, понде, оүби, възл, поведе, дондоста,  
 обвеселиста, быс(т'), направи, понде, полюбиста, жста, възл, бѣ, үвѣдѣ, разгнѣва,  
 поустити, въпроси, разгнѣва, реч(є), реч(є), възврати, възатъ, разгнѣвѣ, поуститаста,  
 рекоста, поуститаста, начатъ, втвѣща, направи, понде, възл, наїазди, оүдари, поклякнж,  
 реч(є), въпроси, реч(є), реч(є), даде, реч(є), понде, реч(є), приде, реч(є), ста,  
 направи, понде, оүвѣдѣ, наряди, понде, наїаздиста, үрва, приспѣ, створи, може, үвѣже,  
 видѣ, реч(є), говорѣхъ, Видѣхъ, приде, рече(є), поустити, видѣ, оүбоа, начал, реч(є), начаста,  
 оүби, приваза, повлѣче, оүби, быс(т'), поустити, реч(є), понде, бѣ, даде, реч(є), искова,  
 пүстити, видѣ, разбоүди, начал, иде, реч(є), реч(є), начал, сказа, видѣ, изыде, начаста,  
 посѣче, вввлѣче, видѣхъ, дѣнж, начал, проводи, быс(т'), направи, изыдошж, възл,  
 метнж, реч(є), съвлѣче, обвлѣче, иде, ста, реч(є), врати, понде, биста, постависта, оүби,  
 изыде, начаста, наїазди, үрва, прободе, паде, възл, занесе, начашл, възл, понде, начал,  
 донде, начал, быс(т'), леґошж, оүснжшж, начал, обрѣте, оүстраши, реч(є), реч(є),  
 реч(є), реч(є), реч(є), понесе, прѣдашж, начашл, реч(є), пондоста, клл, втстѣпи,  
 поклякнж, оүдари, издѣше, озлови, съвлѣче, втпоустити, сказа, изломишж, плакашж,  
 поржчиста, съжеже, вьсыпа, втпоустити, дивішж, начал, реч(є), придохъ, втвѣща, реч(є),  
 смѣ, пондохъ, приведохъ, сташж, пондосте, реч(є), дондохмы, үрва, бѣ, отлхъ, реч(є),  
 заложихъ, пондохъ, створи[хъ], извѣдохъ, дондохъ, реч(є), пондохъ, възлхъ, оүдарихъ,

поклакнѣ, нача, поустистѣ, привѣдохъ, дашѣ, видѣ, иза, прободе, озлоби, видѣ, озлобиста, рече, направи, поустѣ, оумысли, повелѣ, створи, избра, посади, съкры, потаишѣ, изыдошѣ, видѣшѣ, повѣдашѣ, рекошѣ, рекошѣ, сътворишѣ, повезо[ш]ѣ(?), дондошѣ, може, рекошѣ, реч(ѣ), растлькошѣ, въвезошѣ, быс(т'), разьвишѣ, исѣкошѣ, приспѣшѣ, начашѣ, изметашѣ, изведошѣ, реч(ѣ), быс(т'), остави, ѡтвѣща, реч(ѣ), повелѣ, скончашѣ, изведошѣ, посѣкошѣ, погынѣ, дадошѣ, поведе, поведе, оувѣдѣ, сконча, повелѣ, реч(ѣ), присташѣ, въза, обрѣте, възпи, изыде, проблужи, събодошѣ, повишѣ, възврати, сконча, провъзвѣсти, Видѣхъ, мимнодохъ[sic], обрѣте, възлюбѣ, потрѣби

Total: approx. 603

### Imperfects

бѣше, зовѣше, бѣше, бѣше, течаше, течаше, именоваше, течаше, зовѣше, стоаше, зовѣше, стоаше, растѣхѣ, имѣше, мѣислѣше, растѣше, идѣхѣ, играахѣ, сваждааше, бодѣхѣ, прѣмагааше, внаше, прѣмагааше, внаше, полагааше, бѣше, хождааше, играаше, прѣмагааше, женѣше, чюаше, бѣхѣ, бѣше, идѣше, строаше, хотѣхѣ, мѣшлѣаше, г(лаго)лахѣ, въземѣхѣ, идѣхѣ, играахѣ, градѣхѣ, градѣхѣ, г(лаго)лахѣ, позвахѣ(?), бѣше, велѣше, веселѣхѣ, гадѣше, зиздаше, речахѣ, идѣше, носѣше, зиздавахѣ, речахѣ, разтгнѣвахѣ, идѣше, говорѣше, вѣроуахѣ, просѣше, хотѣше, сѣдше(?), пнахѣ, приемахѣ, написовааше, говорѣше, оумѣаше, познавааше, клѣнѣше, писааше, мльчаше, хотѣхѣ, вѣдѣхѣ, бѣше, бѣше, Бѣше, вѣдѣше, бѣше, обладаше, знаахѣ, смѣаше, пробиваше, идѣше, стрѣлѣаше, потаплѣаше, щитѣше, лежаше, зовѣше, лежаше, хѡтѣше, хотѣше, идѣше, зовѣше, бѣше, бѣше, желааше, ѡбѣдовахѣ(?), стоаше, хотѣхѣ, бѣше, творѣше, поражааше, погоублѣаше, боаше, хотѣста, бѣше, помираахѣ, хотѣше, ѡтвѣщавааше, лежаше, хотѣше, лежахѣ, внаше, сѣдѣше, радѣаше, лежаше, възбранѣвахѣ, хотѣше, хотѣше, дааше, съвъземѣхѣ, даваше, орѣше, сѣаше, хтѣхмѣ, смѣаше, погоубльша(?), можахѣ, сѣдѣхѣ, начахѣ, имѣхѣ, зовѣше, кралювааше, бѣше, хотѣхѣ, дадохѣ(?), бѣше, начахѣ(?), тѣшаше

Total: approx. 138

**Note:** The assignment of these forms to the aorist and imperfect categories is sometimes uncertain and controversial, due to lack of clarity in the manuscript and, most of all, due to large-scale phonological and morphological changes underway in Middle Bulgarian. See the index in Dujčeva and Lixačeva (1988) and the glossary in Ruseva (2011), where problematic analyses are sometimes noted. For instance, Vasilev (1972: 344) remarks that in the Tale the 3PL ending of the imperfect has been taken over by the following verbs for the aorist: *позвахѣ/pozva-xo* ‘called’, *ѡбѣдовахѣ/obēdova-xo* ‘had lunch’, *дадохѣ/dado-xo* ‘gave’ (cf. the next sample); so these forms are in all probability aorists, although I have included them in the imperfect category here in view of a unified treatment of the originally exclusively imperfect ending. In either case, these controversial decisions do not alter the statistics greatly.
