# Supplementary material
Source: publisher figshare collection journal article supplement (https://brill.figshare.com/articles/dataset/_/9675644)
Supplement: Supplementary file 11 [file 1]

#### APPENDIX 4: THE SECOND SHEPHERDS' PLAY (SECUNDA PASTORUM)

Sources: Walker (2000) and <http://people.ucalgary.ca/~scriptor/towneley/plays/second.html> (accessed on 22 July 2016)

Line references are to Walker's (2000) edition; 754 lines

Word count: approx. 5,825 words (based on

<http://people.ucalgary.ca/~scriptor/towneley/plays/second.html>, accessed on 22 July 2016)

#### HAVE-PERFECTS WITH TRANSITIVES

(incl. prepositional objects, implied/unexpressed objects, and the copula *be*)

1. oft **have** we not **sene** ['we've not seen this often'] [56, translation from Walker (2000: 43)]
2. My parte **have** I **fun** ['found/played'] [78]
3. **Had I wist** ['Had I known'] [93, translation from Walker (2000: 44)]
4. Mekyll styll mowmyng ['continual lamentation'] **has** wedyng home **brought**  
And greffys ['griefs'] [94-95]
5. **Had** she oones **wett** hyr whystyll ['Once she has wet her whistle [had a drink]'] [104, translation from Walker (2000: 44)]
6. I wald ['wish'] I had ryn ['run'] to ['until'] I **had lost** hir [108]
7. Bot full yll **have** I **ment** ['spoken'] [141]
8. abyde unto syne ['until after']  
We **have mayde** it [148-149]
9. me thoght I **had sene** ['recognised'] you [219]
10. To ['until'] I **have done** that I wyll [279]
11. to ['until'] that I **have doyne** [280]
12. I **have skapyd**, lelott, oft as hard a glase ['I have escaped, Gyll, from many a harder blow [in the past].'] [316, translation from Walker (2000: 48)]
13. A good bowrde ['trick'] **have** I **spied** ['conceived'] [332]
14. Bot what ende **has** thou **mayde** with the hyrdys ['shepherds'], Mak? [422]
15. A fat wedir ['wether (castrated ram)'] **have** we **lorne** ['lost'] [451]
16. I **have soght** with my doges ['dogs']  
All Horbery ['Horbury, a town south of Wakefield'] shroges ['bushes'] [454-455]
17. Had I bene thore ['there']

- som ['someone'] **shuld have boght** it full sore. [508-509]
18. We **have merkyd** amys ['aimed wrongly'] [551]
19. Bot **have done** as tyte [627]
20. for now is He borne  
That shall take fro the Feynd that Adam **had lorne** ['what Adam had lost'] [638-639,  
translation from Walker (2000: 55)]
21. **Have done!** [663]
22. Patryarkes ['patriarchs'] that has bene, and prophetys beforne,  
Thay desyryd to **have sene** this chylde that is borne. [692-693]
23. Thay ar gone full clene, that **have** thay **lorne**. ['they have lost the chance'] [694,  
translation from Walker (2000: 56)]
24. It is true as steyll ['steel']  
That ['what'] prophetys **have spokyn** [699-700]
25. Thou **has waryed** ['cursed'], I weyne ['believe'], the warlo ['warlock'] so wyld  
[712]
26. I **have holden** ['kept'] my hetyng ['promise'] [717]
27. for Thou **has us soght** [719]
28. Hayll, frely foyde ['noble child'] and floure ['flower'], that all thyng **has wrought**  
[720]
29. A byrd **have I broght**  
To my barne ['child'] [722-723]
30. His Son **has** He **sent** [738]
31. What grace we **have fun** ['found']. [751]
32. So farys ['thus fares']  
A huswyff that **has bene**  
To be rasyd thus betwene ['continually interrupted'] [300-302]
33. And I shall go stalk prevely ['creep quietly']  
As it **had** never **bene** I  
that caryed ['took away'] thare shepe [347-349]
34. **Had I bene** thore ['there']  
som ['someone'] shuld have boght it full sore. [508-509]
35. Patryarkes ['patriarchs'] that **has bene**, and prophetys beforne,

Thay desyryd to have sene this chylde that is borne. [692-693]

#### **HAVE-PERFECTS WITH INTRANSITIVES**

1. so long **have** I **nappyd** ['slept'] [2]
2. I wald ['wish'] I **had ryn** ['run'] to ['until'] I had lost hir [108]
3. When we **have ryn** ['run'] in the myre [160]
4. Mak where **has** thou **gone**? [199]
5. Lord, what I **have slept** weyll [355]
6. When we **had** long **napt** [370]
7. A, my nek **has lygen** wrang  
Enoghe [380-381]
8. Ye **have ryn** in the myre, and ar weytt yit ['still wet'] [494]
9. Wyst ye how she **had farne** ['suffered'] youre hartys wold be sore [531]
10. To a woman that **has farne** ['suffered'] [533]
11. and fowll **has** thou **farne** ['acted'] [576]

#### **MODAL HAVE**

1. **Have hald** my hand [350, unclear]
2. I **had** lever ['rather'] **be** dede ['dead'] or ['than'] she had any dyseasse. [486]
3. We **have** it **not to lose**. [673, Walker (2000: 56) suggests the sense 'We have nothing to lose', so it is not at all certain if *have* has a modal colouring here]

#### **BE-PERFECTS WITH MUTATIVE INTRANSITIVES**

1. **Is** he **commen**? [200, Walker (2000: 46) gives the translation 'Is he here?', which might be anachronistic.]
2. Here shall we hym hyde to ['until'] thay **be gone** [333]
3. All glad **were** ye **gone**! [568]
4. Thay **ar gone** full clene, that have thay lorne. ['they have lost the chance'] [694, translation from Walker (2000: 56)]

## PASSIVES

1. We **are mayde** hand tamyd ['subservient']  
With ['by'] thys gentlery ['gentry'] men. [17-18]
2. Thus **ar** husbandys ['labourers'] **opprest** [22]
3. I were better **be hangyd** [44]
4. thay **ar led** full hard full yll [75]
5. **Was** never syn Noe ['Noah's] floode sich floodys **seyn** ['seen'] [127]
6. I **were eten** ['eaten'] outt of howse ['house'] and of harbar ['harbour, shelter'] [245]
7. if it **were told** ['reckoned up'] [272]
8. So farys ['thus fares']  
A huswyff that has bene  
To **be rasyd** thus betwene ['continually interrupted'] [300-302]
9. Here **may** no note ['work'] **be sene** [303]
10. to **be hanged** for the case [315]
11. Bot let it never **be spoken** [321]
12. I wold he **were flayn** ['skinned'] [323]
13. Com thay or ['ere, before'] he **be slayn** [325]
14. Then **myght I be tane** ['taken'] [326]
15. And I shall say thou **was light** ['delivered']  
Of a knave ['boy'] childe this nyght [337-338]
16. That ever **was I bred** ['born'] [340] (cf. Gräf 1888: 18–19)
17. I **was flayd** ['tormented'] with a swevyn ['dream'] [384]
18. As ['as if'] he **were holden** in the throte [410]
19. Alas that ever **was I borne!** [450] (cf. Gräf 1888: 18–19)
20. oure shepe that we gett ['guard']  
**Ar stollyn** as thay yede ['walked'] [505-506]
21. I trow ['believe'] oure shepe **be slayn** [541]
22. hys noyse ['nose'] **was brokyn.**

23. Sythen told me a clerk that he **was forspokyn** [‘bewitched’] [612-613]
24. I **wold** fayn **be wrokyn** [‘revenged’] [614]
25. He **was takyn** with [‘by’] an elfe [616]
26. When the klok stroke twelf  
    **Was** he **forshapyn** [‘exchanged’] [618-619]
27. With you **will** I **be left** [623]
28. for now **is** He **born**  
    That shall take fro the Feynd that Adam had lorne [‘what Adam had lost’] [638-639,  
    translation from Walker (2000: 55)] (cf. Gräf 1888: 19)
29. this nyght **is** He **born** [640] (cf. Gräf 1888: 19)
30. God **is made** youre freynd now at this morne [641]
31. In a cryb **was** He **layde** [689]
32. Patryarkes [‘patriarchs’] that has bene, and prophetys beforne,  
    Thay desyryd to have sene this chylde that **is borne**. [692-693] (cf. Gräf 1888: 19)
33. And now **is** He **borne** [741] (cf. Gräf 1888: 19)
34. For sothe all redy it semys to **be told**  
    Full oft. [‘Truly, it seems right to tell our story often.’] [749-750, translation from  
    Walker (2000: 57)]
35. Com furth now **ar** we **won** [‘saved’] [752]
36. To syng **ar** we **bun** [‘bound, obliged’] [753]

#### AMBIGUITY BETWEEN PASSIVE AND STATIVE

1. and I **am** yll **happyd** [‘clothed’] [1]
2. for I **am** al **lappyd** [‘wrapped’] [4]
3. my fyngers **ar** **chappyd** [‘sore’] [3]
4. We **are** so **hamyd** [‘hamstrung’]  
    **For-taxed** [‘over-taxed’] and **ramyd** [‘oppressed’] [15-16]
5. These men that **ar wed** have not all thare [‘their’] wyll [73]
6. When thay **ar** full hard **sted** [‘pressed’]
7. Wo is hym that **is bun** [‘bound (to a wife)’] [80]

8. I wote ['believe'] so **forwakyd** ['tired'] **is** none in this shyre [253]
9. I **am** wery, **for-rakyd** ['exhausted'] and run in the myre [256]
10. If the flok **be skard** ['scared'] [289]
11. Me thocht he **was lapt** ['wrapped'] in a wolfe skyn [368]
12. So **are** many **hapt** ['dressed'] now namely ['especially'] within [369]
13. I hope thay **wyll nott be** well **payde** when thay thare shepe lak. ['I think they will not be well pleased when they find their sheep missing'] [425, translation from Walker (2000: 50)]
14. Well **qwytt** ['paid'] **is** my hyre ['wages'] [497]
15. He **is merkyd** amys ['deformed'] [586]
16. I PASTOR  
 [...] thus to **be skard** ['scared'].  
 II PASTOR  
 Of Godes Son of Hevyn he spak ['spoke'] upward ['above us']. [648-649]
17. He **was** poorly **arayd** ['clothed'],  
 Both mener ['poor'] and mylde. [690-691]

#### AMBIGUITY BETWEEN BE-PERFECT AND PASSIVE OR STATIVE

1. I **am** wery, for-rakyd ['exhausted'] and **run** in the myre [256]
2. I **am sett** for to spyn [298]

#### MISSING AUXILIARY
