# Supplementary material
Source: publisher figshare collection journal article supplement (https://brill.figshare.com/articles/dataset/_/9675644)
Supplement: Supplementary file 12 [file 1]

## APPENDIX 8: THE CORRESPONDENCE OF SAMUEL PEPYS

Letters exchanged between Samuel Pepys and John Evelyn (27 April – 14 October 1665)

Source: <http://www.pepysdiary.com/letters/> (accessed on 01 Sept 2016)

Word count: approx. 3,651 words

### HAVE-PERFECTS WITH TRANSITIVES

(incl. prepositional objects, implied/unexpressed objects, and copula and auxiliary *be*)

1. a Shipp of ours (the little Guift) that in a Conflict with a Hollander on the Irish Coast (wherein shoe though much over matched **hath acquitted** her selfe very
2. well) **hath had** severall Men wounded [P to E, Thursday 27 April 1665]
3. Sir I **have looked** after when you woulde thinke fitt... [P to E, Wednesday 9 August 1665]
4. as I will in every thing else, soe I **have** in your request this afternoone **done** what you with any moderate reason can expect of mee [P to E, Tuesday 26 September 1665]
5. consider that what I **have done** reaches but for foure days [P to E, Tuesday 26 September 1665]
6. what wee **have done** herein being very irregular, and not excusable I thinke to bee done twice [P to E, Tuesday 26 September 1665]
7. Sir I would have been glad to **have kissed** your hands before I returne to the fleete [P to E, Tuesday 26 September 1665]
8. The inclos'd **had kiss'd** your hands before this, **had** not the most infinite
9. trouble of other dispatches in order to your Commands, **hindered** mee [E to P, Saturday 30 September 1665]
10. I **have sent** for a Martiall to Chel[sea] to send downe to Erith [E to P, Saturday 30 September 1665]
11. to resigne the honor his Majestie **has don** me [E to P, Saturday 30 September 1665]
12. I **have** not **eaten** one bit of bread to-day [E to P, Saturday 30 September 1665]
13. Sir, I **have had** earnest intreaties from Severall of the Commanders [E to P, Tuesday 3 October 1665]
14. and that I **have peopld** all the intermedial Villages [E to P, Tuesday 3 October 1665]
15. it is not without reason I **have made** my Complaints nor at all my crime [E to P, Tuesday 3 October 1665]
16. It was also tr[eat]ed as a failure in my Industry, that I **had** not **receiv'd** the Prisoners into my c[are] and **assisted** towards the raising the £5000 to be assign'd me [E to P, Tuesday 3 October 1665]

17. when I **had** also **provided** Guards to secure them [E to P, Tuesday 3 October 1665]
18. when I **have touch'd** the mony which must make them live [E to P, Tuesday 3 October 1665]
19. **having** since I saw you **contracted** with my Lord Culpeper (fourty miles from this place,) for Leeds-Castle, where I am repairing [E to P, Tuesday 3 October 1665]
20. Sir, in a Word, I **have studied** my Commission [E to P, Tuesday 3 October 1665]
21. he was pleased to Order what was so very necessary, and I **have** not I hope **presum'd** to any favour upon my own Score [E to P, Tuesday 3 October 1665]
22. **having alarm'd** all the rest (not one excepted) with my continual representations of our miserys [E to P, Tuesday 3 October 1665]
23. you will find I **have taken** too exact a measure of your reale merits [E to P, Tuesday 3 October 1665]
24. as I beseech you to believe, that I **have** not in this paper **exaggerated** any
25. thing of mine Owne Sufferings, to magnifie the poore Service I **have** hitherto **don** [E to P, Tuesday 3 October 1665]
26. which is a caution we **have chargd** our Chirurgeons to insert [E to P, Thursday 12 October 1665]
27. and these coming under my particular cognizance, as I **have had** (to the greate increase of my Trouble) the Hospitals of London to look after during the absence of my Brother Commissioners [E to P, Thursday 12 October 1665]
28. By what I **have sent** you, you will have a Specimen of the Method observed where I have any-thing to do [E to P, Saturday 14 October 1665]
29. Take notice also, I pray, how few **have miscarried** [Most of those who dyed perished for want of covering] [E to P, Saturday 14 October 1665]
30. The Certificates answer to every individual person, which after you **have perus'd**, and are satisfied in, pray returne by this bearer [E to P, Saturday 14 October 1665]
31. The two printed papers are an invention I **have** particularly **practis'd** in my owne Circle onely [E to P, Saturday 14 October 1665]
32. for that a charge is and **hath** for a good while **beene** running on at Kinsale in expectation of paiement from this office [P to E, Wednesday 9 August 1665]
33. besides that, I **have been** told, That it **hath beene** by the King and Councill
34. left to the Lord Leiuetent of Ireland to give directions in [P to E, Wednesday 9 August 1665]

35. Sir I **would have been** glad to have kissed your hands before I returne to the fleete [P to E, Tuesday 26 September 1665]
36. Nor did I in the least obtrude the importunity which I am sensible the Prisoners **have been** to you [E to P, Tuesday 3 October 1665]
37. Nor **have** I yet **been** wanting in giving notice to the Greate-ones at Court [E to P, Tuesday 3 October 1665]
38. I am this afternoone to send away £1000 to Deale and Dover with a Guard, not **having been** able to find any opportunity of returning the mony otherwise [E to P, Friday 13 October 1665]
39. with one article alone **would have been** double all the expense [E to P, Saturday 14 October 1665]

#### HAVE-PERFECTS WITH INTRANSITIVES

1. For finding divers Chyrurgeons, and Sick-persons at my dores who **had come** from Several places with sad complaints that they could not procur quarters for them [E to P, Tuesday 3 October 1665]
2. as you **have** lately **seem'd** to impute it to me [E to P, Tuesday 3 October 1665]
3. What **has come** collateraly on you (not through my fault) ought not be imputed to me [E to P, Tuesday 3 October 1665]

#### PASSIVE HAVE

1. a Shipp of ours (the little Guift) that in a Conflict with a Hollander on the Irish Coast (wherein shoe though much over matched hath acquitted her selfe very well) hath **had** severall Men **wounded** [P to E, Thursday 27 April 1665]
2. at Chatham, and Gravesend, where I was threatnd to **have** our sick all **expos'd** [E to P, Saturday 23 September 1665]

#### MODAL AND CAUSATIVE HAVE

1. and these coming under my particular cognizance, as I have **had** (to the greate increase of my Trouble) the Hospitals of London **to look** after during the absence of my Brother Commissioners [E to P, Thursday 12 October 1665]
2. By what I have sent you, you will **have** a Specimen of the Method **observed**
3. where I **have** any-thing **to do** [E to P, Saturday 14 October 1665]

#### BE-PERFECTS WITH INTRANSITIVES

1. (long before this as having prospect sufficient of what **is befallen** us) [E to P, Tuesday 3 October 1665]

### PROGRESSIVES

1. for that a charge **is** and hath for a good while **beene running** on at Kinsale in expectation of paiement from this office [P to E, Wednesday 9 August 1665]
2. If my Lord of Albemarle (to whom I **am** now **hailing**)... [E to P, Saturday 23 September 1665]
3. I was forc'd to dispatch Warrants to the Connestables and other Officers to **be ayding** and assistant to my Deputyes [E to P, Tuesday 3 October 1665]
4. having since I saw you contracted with my Lord Culpeper (fourty miles from this place,) for Leeds-Castle, where I **am repairing**, and **fitting** things for their safty [E to P, Tuesday 3 October 1665]
5. I **am marching** away with the Prisoners as fast as I can [E to P, Thursday 12 October 1665]

### MODAL BE

1. I **am** once more **to trouble** you with my old question [P to E, Wednesday 9 August 1665]
2. Sir, Since I saw you yesterday, comes notice to me that of the £5000 I **was to touch** by promise this Weeke from Mr Kingdome by order of my Lord Ashley, no lesse then £3000 of it is diverted for other purposes from Oxford [E to P, Saturday 23 September 1665]
3. and I will leave you to consider, at whose doores, this dealing at Oxon **is to be** layd [E to P, Saturday 23 September 1665]
4. for I no where find, by my Commission, that I **was to provide** monyes [E to P, Tuesday 3 October 1665]
5. I **am** this afternoone **to send** away £1000 to Deale and Dover with a Guard, not having been able to find any opportunity of returning the mony otherwise [E to P, Friday 13 October 1665]

### PASSIVES

1. hath had severall Men wounded, who **are putt** on shoare for care at Galloway [P to E, Thursday 27 April 1665]
2. give me leave to aske you whether any Provision for sick and wounded men **is made** in Ireland [P to E, Thursday 27 April 1665]
3. Sir, there **is** neither in our Commission, or Instructions the least mention **made** of any provision for Sick and Wounded-men in Ireland [E to P, Monday 1 May 1665]

4. Notwithstanding I conceive it were very fit there **should**, for the future, **be** some courses **taken** for the settling of some Correspondence there for this effect [E to P, Monday 1 May 1665]
5. nor is it fitt the care of it **should be put** upon persons soe little at leisure to look after it as the Officers of the Navy [P to E, Wednesday 9 August 1665]
6. besides that, I have **been told**, That it hath **beene** by the King and Councill
7. **left** to the Lord Leiuetent of Ireland to give directions in [P to E, Wednesday 9 August 1665]
8. I beseech you Sir what advice you can give me in any part hereof, be pleased
9. to let me receive, for that what **is disburst must** soone or late **be paid** some where [P to E, Wednesday 9 August 1665]
10. and the longer it's **left** unsettled 'tis likely the King will be soe much the more Sufferer. [P to E, Wednesday 9 August 1665]
11. and what number of recovered men are ready to **be called** for [P to E, Wednesday 9 August 1665]
12. That soe as we have Ships in the way they **may be directed** to take them in [P to E, Wednesday 9 August 1665]
13. If they **could be conveyd** downe to our Fly-boates before Gravesend [E to P, Saturday 23 September 1665]
14. but you know I **am prohibited** realiving any at Wollwich, even of our Owne men [E to P, Saturday 23 September 1665]
15. therefore I beseech you order them by some meanes or other to **be sent** (viz, the sick onely) to those Vessels at Gravesend [E to P, Saturday 23 September 1665]
16. where there **will be** care **taken** for them [E to P, Saturday 23 September 1665]
17. Sir, Since I saw you yesterday, comes notice to me that of the £5000 I was to touch by promise this Weeke from Mr Kingdome by order of my Lord Ashley, no lesse then £3000 of it **is diverted** for other purposes from Oxford [E to P, Saturday 23 September 1665]
18. at Chatham, and Gravesend, where I **was threatnd** to have our sick all expos'd [E to P, Saturday 23 September 1665]
19. and I will leave you to consider, at whose doores, this dealing at Oxon is to **be layd** [E to P, Saturday 23 September 1665]
20. what wee have done herein being very irregular, and not excusable I thinke to **bee done** twise [P to E, Tuesday 26 September 1665]

21. This being but an iteration of what **was Orderd** on Thursday [E to P, Friday 29 September 1665]
22. I cannot divine how it comes to **be repeated** [E to P, Friday 29 September 1665]
23. But **being told** it **was brought** hither by two Captaines [E to P, Friday 29 September 1665]
24. September 1665]
25. I suppose it **was written** to pacifie their importunity, and quicken the raising
26. of the monyes to **be assign'd** me [E to P, Friday 29 September 1665]
27. There **was** a Copy of the letter, **left** at my house with it, which causes me to write thus confidently of the Contents [E to P, Friday 29 September 1665]
28. but refuse to **be entrtaind** [E to P, Saturday 30 September 1665]
29. One of my men, this afternoone, desiring to **be dismissd** in regu[ar]d of the Contagion [E to P, Saturday 30 September 1665]
30. I know I **shall be thought** impertinent [E to P, Saturday 30 September 1665]
31. nor of so slavish and disingenuous a nature to **be tyd** to impossibility and servitude [E to P, Saturday 30 September 1665]
32. but I can dispence such effects as **shall be put** into my hands for the discharge
33. of what **is intrustd** to me [E to P, Saturday 30 September 1665]
34. we should not have neere the multitudes, which **are impos'd** upon us [E to P, Tuesday 3 October 1665]
35. It **was** also **tr[eat]ed** as a failure in my Industry, that I had not receiv'd the
36. Prisoners into my c[are] and assisted towards the raising the £5000 to **be assign'd** me [E to P, Tuesday 3 October 1665]
37. though I can tell where it **may be had** [E to P, Tuesday 3 October 1665]
38. and I hope I **shall** not **be esteem'd** remisse [E to P, Tuesday 3 October 1665]
39. What has come collateraly on you (not through my fault) **ought** not **be imputed** to me [E to P, Tuesday 3 October 1665]
40. in the station I **am assigned** to the best of my abilities [E to P, Tuesday 3 October 1665]
41. when if their weekly allowance was more then their annual pension; the over-plus **was** only **paid** them, and the pension **defaulted** [E to P, Thursday 12 October 1665]
42. that the pay-master to the Hospital **be ordered** to difalk out of the additional allowance [E to P, Thursday 12 October 1665]

43. Whilst the Principall Officers and Comissioners of his Majesties Navy **are desir'd** to order the Clarke of the Chest to give our pay-master of our Hospital- Sick- Seamen etc an abstract of all Pensions and Gratuities settld at the Chest [E to P, Thursday 12 October 1665]
44. and alsoe that the sayd Clarke might once every fortnight transmitt our Officer a list of such as **are** from time to time **admitttd** into Pensions [E to P, Thursday 12 October 1665]
45. They of late also practise another Cheate; which is, when they **are discharg'd** our Hospitals as cured, to conceale the Chirurgeons Certificats that they are in part, or totally dissabl'd [E to P, Thursday 12 October 1665]
46. They all this while concealing their having pensions, enjoy the Kings Super-allowance in the Hospitals, which formerly **was** not **continud** [E to P, Thursday 12 October 1665]
47. For prevention whereoff you may be pleas'd to order that none **be admitttd** from any our Infirmitories into Pensions [E to P, Thursday 12 October 1665]
48. I long to give it in, and **be discharg'd** of so much of my Burthen [E to P, Saturday 14 October 1665]

#### AMBIGUITY BETWEEN PASSIVE AND STATIVE

1. and what his Majestie **shall be pleas'd** to superadd to his other Commands [E to P, Monday 1 May 1665]
2. I beseech you Sir what advice you can give me in any part hereof, **be pleased** to let me receive, for that what is disburst must soone or late be paid some where [P to E, Wednesday 9 August 1665]
3. At Gravesend we **are forc'd** to make stay of one of the Flie-boats on purpose [E to P, Saturday 23 September 1665]
4. **Be pleasd** to seale [this?] [E to P, Saturday 30 September 1665]
5. and some of these concernd me as far as Deale and Sandwich, where we **are** so **overlayd**, that they send them back upon us, and they perish in the returne [E to P, Tuesday 3 October 1665]
6. I **was forc'd** to dispatch Warrants to the Connestables and other Officers to be ayding and assistant to my Deputyes [E to P, Tuesday 3 October 1665]
7. there were none of those Vessells ready you **were pleas'd** to name [E to P, Tuesday 3 October 1665]
8. he **was pleased** to Order what was so very necessary, and I have not I hope presum'd to any favour upon my own Score [E to P, Tuesday 3 October 1665]

9. **Be assur'd** Sir, from me, that I shall be most tender of adding to your trouble [E to P, Tuesday 3 October 1665]
10. till he **is pleas'd** to release me [E to P, Tuesday 3 October 1665]
11. we **are** even **forc'd** to renew our Petition for prevention of the mischeife which now threatens more then ever [E to P, Thursday 12 October 1665]
12. First, Our men in the London Hospitals steale downe to Chatham before they **are Cur'd** [E to P, Thursday 12 October 1665]
13. For prevention whereoff you **may be pleas'd** to order that none be admittd from any our Infirmitories into Pensions [E to P, Thursday 12 October 1665]
14. If the heads be not particular enough, **be pleas'd** to give me your instructions where I may pertinently add [E to P, Saturday 14 October 1665]
15. The Certificates answer to every individual person, which after you have perus'd, and **are satisfied** in, pray returne by this bearer [E to P, Saturday 14 October 1665]

#### AMBIGUITY BETWEEN *BE*-PERFECT AND PASSIVE OR STATIVE

#### MISSING AUXILIARY

1. From a letter this day **come** to my hand from a Shipp of ours [P to E, Thursday 27 April 1665]
2. but how shall we (when **recoverd**) secure them from running away? [E to P, Saturday 23 September 1665]

#### 'S CONTRACTION
