# Supplementary material
Source: publisher figshare collection journal article supplement (https://brill.figshare.com/articles/dataset/_/9675644)
Supplement: Supplementary file 13 [file 1]

|                                                                                        |  |
|----------------------------------------------------------------------------------------|--|
| <b>APPENDIX 1: FREQUENCY OF PERFECTS AND PRETERITES IN ENGLISH...</b>                  |  |
| <b>APPENDIX 2.1: <i>THE ANGLO-SAXON CHRONICLE</i> (MANUSCRIPT A).....</b>              |  |
| <b>APPENDIX 2.2: <i>THE PETERBOROUGH CHRONICLE</i> (MANUSCRIPT E).....</b>             |  |
| <b>APPENDIX 3: CHAUCER.....</b>                                                        |  |
| <b>APPENDIX 4: <i>THE SECOND SHEPHERDS' PLAY</i> (<i>SECUNDA PASTORUM</i>).....</b>    |  |
| <b>APPENDIX 5: SHAKESPEARE.....</b>                                                    |  |
| <b>APPENDIX 6: <i>THE COUNTRY WIFE</i>.....</b>                                        |  |
| <b>APPENDIX 7: PASTON LETTERS.....</b>                                                 |  |
| <b>APPENDIX 8: THE CORRESPONDENCE OF SAMUEL PEPYS.....</b>                             |  |
| <b>APPENDIX 9: LESSING (EIGHTEENTH-CENTURY GERMAN).....</b>                            |  |
| <b>APPENDIX 10: <i>THE TALE OF TROY</i> (FOURTEENTH-CENTURY BULGARIAN)..</b>           |  |
| <b>APPENDIX 11: <i>DAMASCENUS TROIANENSIS</i> (SEVENTEENTH-CENTURY BULGARIAN).....</b> |  |
| <b>APPENDIX 12: <i>A SLAVONIC-BULGARIAN HISTORY</i> (1762).....</b>                    |  |
